# Supplementary material for: Amphiphilic palladium NHC-complexes with chelating bis-NHC ligands based on imidazole-4,5-dicarboxylic acid: synthesis and catalysis in water
Source: Royal Society of Chemistry journal article supplement (doi:10.1039/d4ob01636j), 2024-12-09
Supplement: d4ob01636j1.pdf [file d4ob01636j1.pdf]

*Electronic Supplementary Information for*

**Amphiphilic Palladium NHC-complexes with Chelating Bis-NHC Ligands Based on Imidazole-4,5-dicarboxylic Acid: Synthesis and Catalysis in water.**

*Dmitriy D. Radaev<sup>1</sup>, Daria P. Duglav<sup>1</sup>, Elizaveta A. Pushkareva<sup>1</sup>, Elza D. Sultanova<sup>1</sup>, Artur A. Khannanov<sup>1</sup>, Vladimir G. Evtugyn<sup>2</sup>, Svetlana E. Solovieva<sup>3</sup>, Vladimir A. Burilov<sup>\*1</sup> and Igor S. Antipin<sup>1</sup>*

<sup>1</sup>Alexander Butlerov Institute of Chemistry, Kazan Federal University, 18 Kremlevskaya Str., 420008 Kazan, Russia.

<sup>2</sup>Interdisciplinary Center for Analytical Microscopy, Kazan Federal University, 18 Kremlevskaya Str., 420008 Kazan, Russia.

*\*Correspondence ultrav@bk.ru; Tel. +7-843-2337344*

## Contents

|                                                                                                                                                                                        |    |
|----------------------------------------------------------------------------------------------------------------------------------------------------------------------------------------|----|
| <b>Figure S2.</b> NMR <sup>13</sup> C spectrum (100.6 MHz, CDCl <sub>3</sub> , 25 °C) of imidazole <b>2</b> .....                                                                      | 4  |
| <b>Figure S4.</b> HR-ESI mass-spectrum of imidazole <b>2</b> .....                                                                                                                     | 6  |
| <b>Figure S6.</b> NMR <sup>13</sup> C spectrum (100.6 MHz, CDCl <sub>3</sub> , 25 °C) of bis-imidazolium salt <b>4</b> .....                                                           | 8  |
| <b>Figure S8.</b> HR-ESI mass-spectrum of bis-imidazolium salt <b>4</b> .....                                                                                                          | 10 |
| <b>Figure S10.</b> NMR <sup>13</sup> C spectrum (100.6 MHz, CDCl <sub>3</sub> , 25 °C) of bis-imidazolium salt <b>5</b> .....                                                          | 12 |
| <b>Figure S12.</b> HR-ESI mass-spectrum of bis-imidazolium salt <b>5</b> .....                                                                                                         | 14 |
| <b>Figure S17.</b> Calculated isotopic distribution for complex <b>6</b> ([M-I] <sup>+</sup> , C <sub>49</sub> H <sub>84</sub> IN <sub>4</sub> O <sub>20</sub> Pd <sup>+</sup> ) ..... | 19 |

|                                                                                                                                                                                                                                                                                                                                                                                                                                                                                                             |    |
|-------------------------------------------------------------------------------------------------------------------------------------------------------------------------------------------------------------------------------------------------------------------------------------------------------------------------------------------------------------------------------------------------------------------------------------------------------------------------------------------------------------|----|
| <b>Figure S18.</b> NMR $^1\text{H}$ spectrum (400 MHz, $\text{CDCl}_3$ , 25 °C) of complex <b>7</b> .....                                                                                                                                                                                                                                                                                                                                                                                                   | 20 |
| <b>Figure S19.</b> NMR $^{13}\text{C}$ spectrum (100.6 MHz, $\text{CDCl}_3$ , 25 °C) of complex <b>7</b> .....                                                                                                                                                                                                                                                                                                                                                                                              | 21 |
| <b>Figure S17.</b> HR-ESI mass-spectrum of complex <b>7</b> .....                                                                                                                                                                                                                                                                                                                                                                                                                                           | 23 |
| <b>Figure S19.</b> LC-MS data of the reaction mixture of bis-imidazolium salt <b>2</b> with 1-iodooctane after 30 h of stirring at 90°C. ....                                                                                                                                                                                                                                                                                                                                                               | 25 |
| <b>Figure S21.</b> UV-visible spectra and $\ln(C_t/C_0)$ time dependence of a mixture of <i>p</i> -nitrophenol and sodium borohydride in the presence of <b>6</b> ; water-THF, where THF is 0.4 vol.%, $C(p\text{-nitrophenol})=0.1$ mM, $C(\text{NaBH}_4)=5$ mM, $C(\mathbf{6})=0.002$ mM (0.2 mol%), $l=1\text{cm}$ . ....                                                                                                                                                                                | 30 |
| <b>Figure S22.</b> Time dependence of $\ln(C_t/C_0)$ of a mixture of <i>p</i> -ethylnitrobenzene and sodium borohydride in the presence of <b>6</b> , <b>7</b> , <b>4</b> +Pd(OAc) $_2$ , <b>5</b> +Pd(OAc) $_2$ , Pd(OAc) $_2$ or Pd-PEPPSI; water with 0.2 vol% THF, $C(p\text{-ethylnitrobenzene}) = 0.1$ mM, $C(\text{NaBH}_4)=5$ mM, $C(\mathbf{4}) = C(\mathbf{5}) = C(\mathbf{6}) = C(\mathbf{7}) = C(\text{Pd}(\text{OAc})_2) = C(\text{Pd-PEPPSI}) = 0.002$ mM (0.2 mol%), $l = 1\text{cm}$ . .... | 31 |
| <b>Figure S22.</b> SAED images of compound A <b>4</b> + Pd(OAc) $_2$ and B <b>5</b> + Pd(OAc) $_2$ . ....                                                                                                                                                                                                                                                                                                                                                                                                   | 32 |
| <b>Table S1.</b> Interplanar distances $d$ (hkl) measured on the complex <i>in situ</i> and possible correlation to fcc Pd and tetragonal PdO                                                                                                                                                                                                                                                                                                                                                               | 33 |

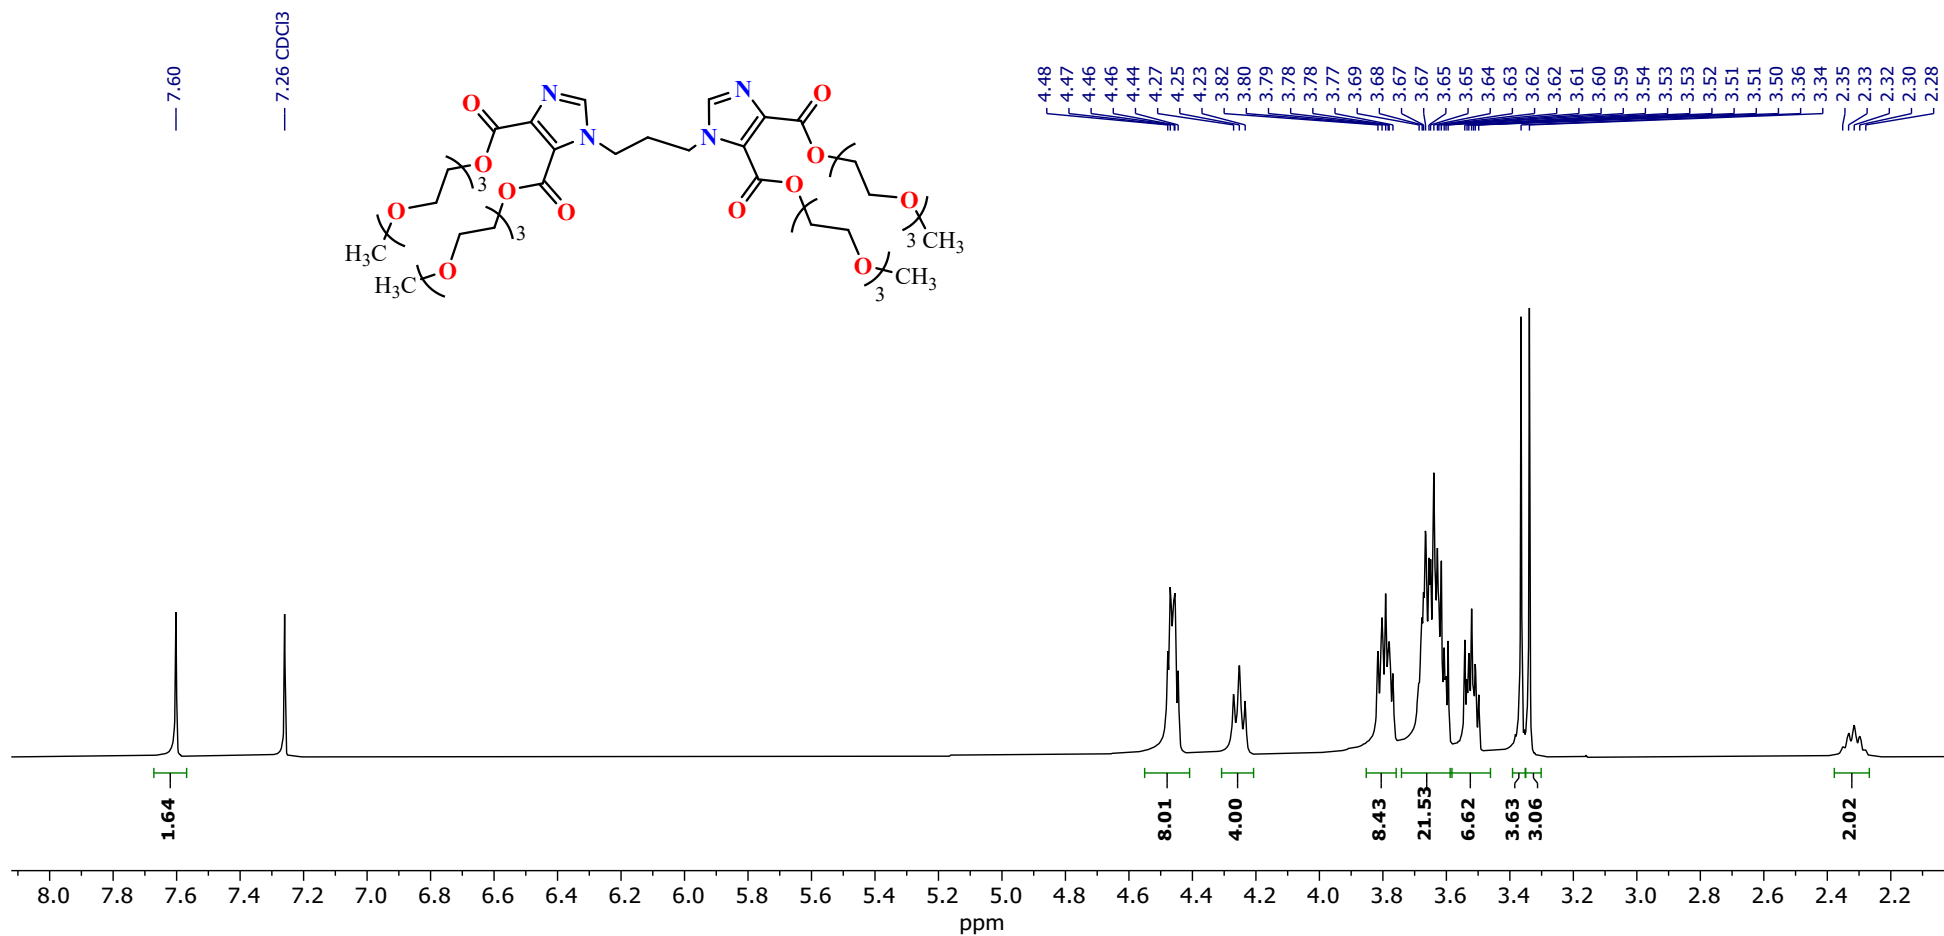

Figure S1. NMR  $^1\text{H}$  spectrum (400 MHz,  $\text{CDCl}_3$ , 25  $^\circ\text{C}$ ) of imidazole 2

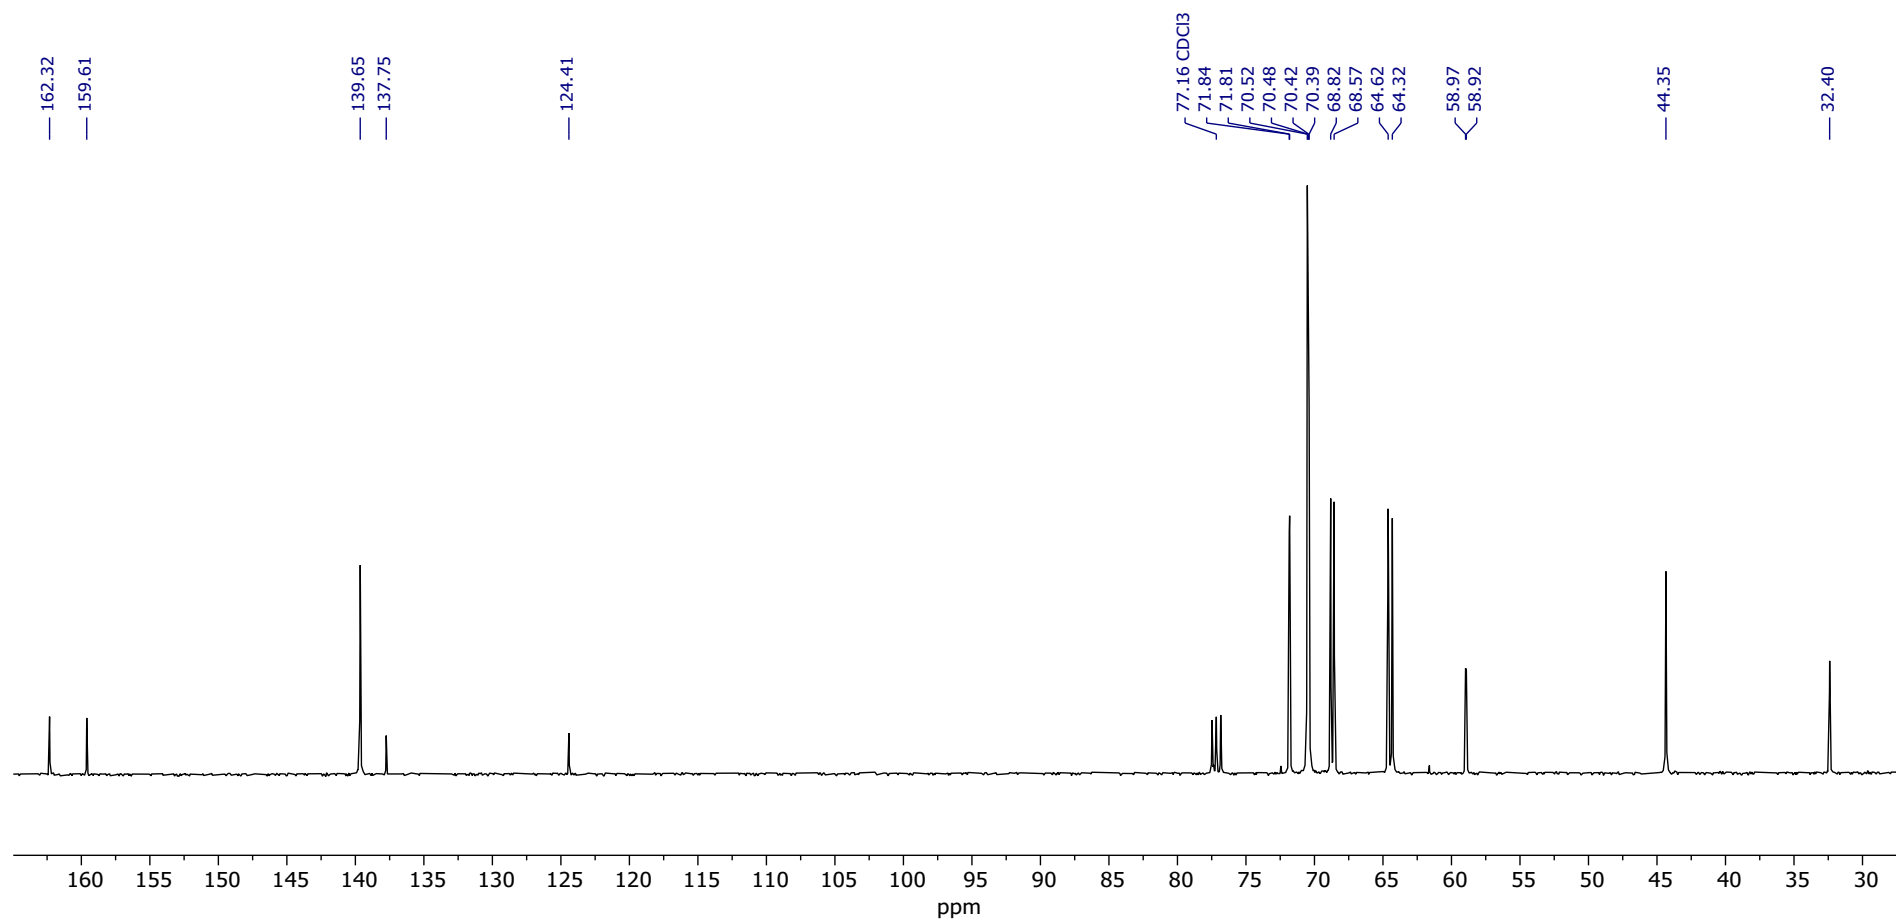

**Figure S2.** NMR <sup>13</sup>C spectrum (100.6 MHz, CDCl<sub>3</sub>, 25 °C) of imidazole 2

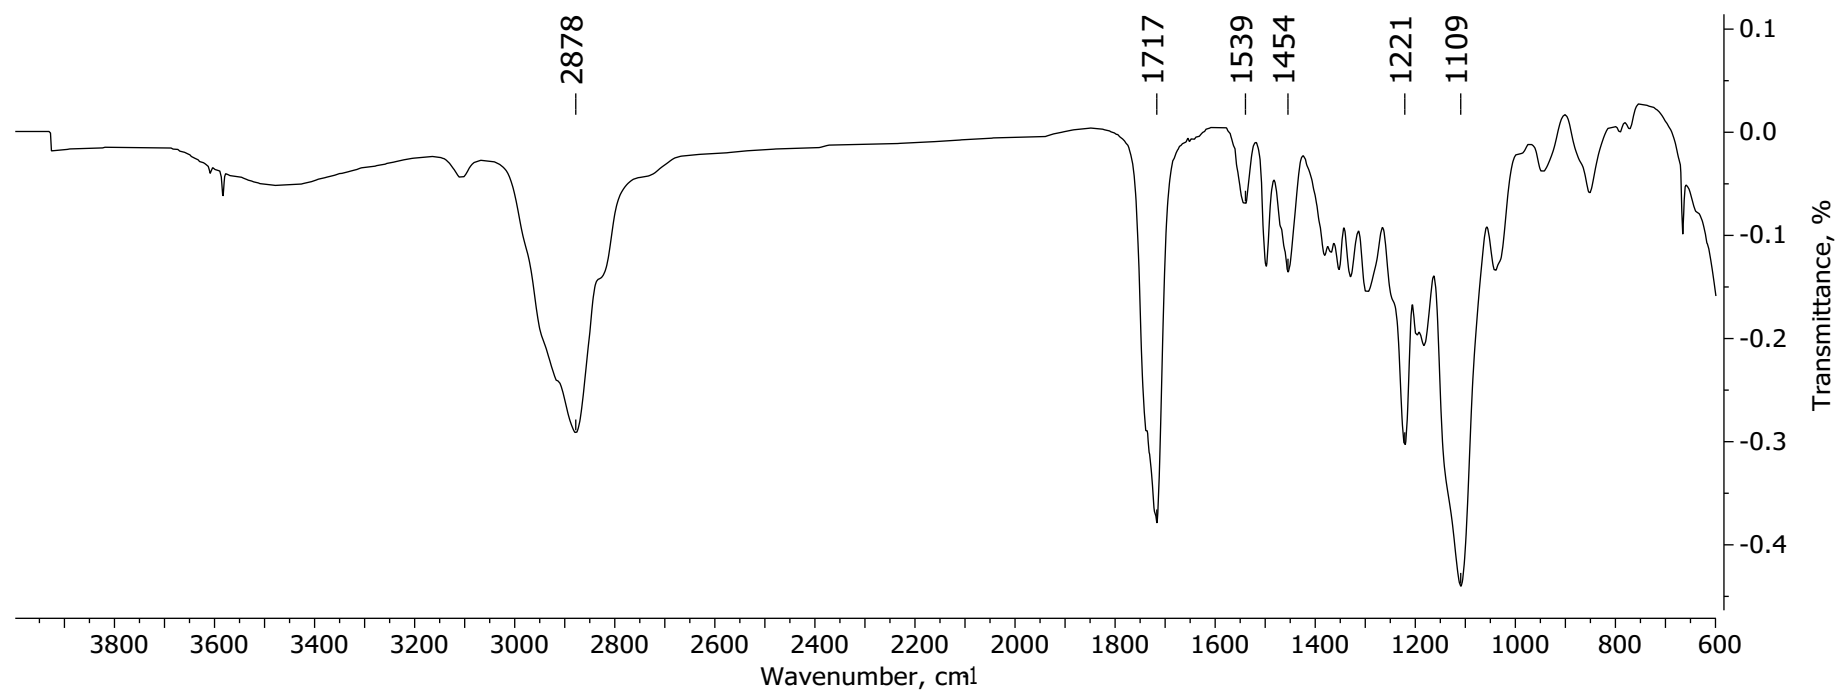

**Figure S3.** FT-IR spectrum of imidazole **2**

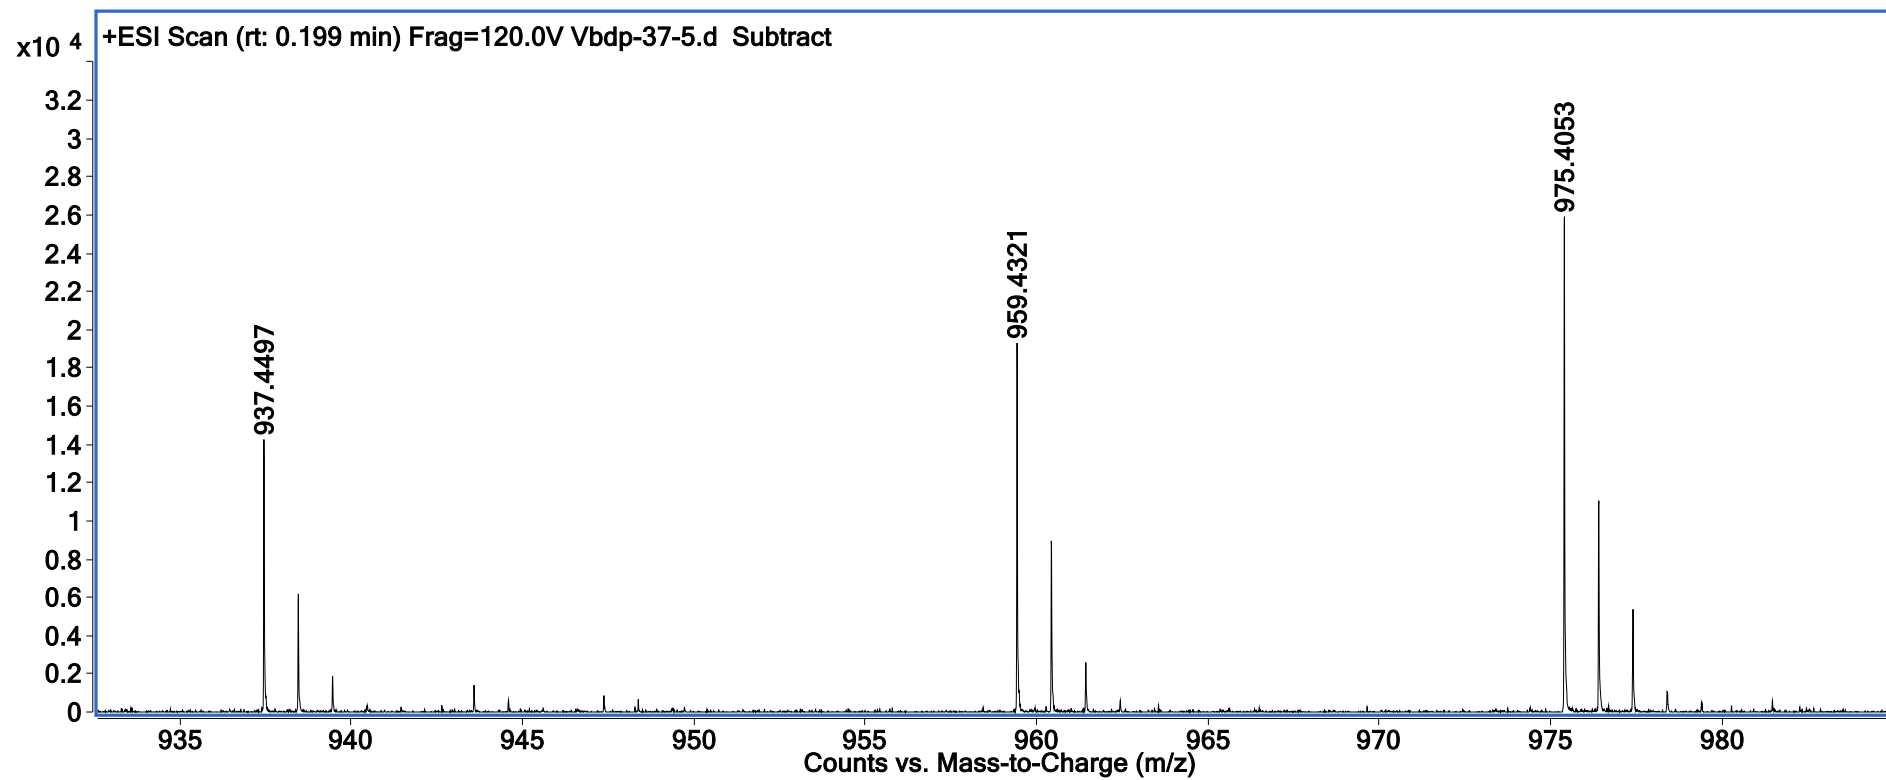

Figure S4. HR-ESI mass-spectrum of imidazole 2



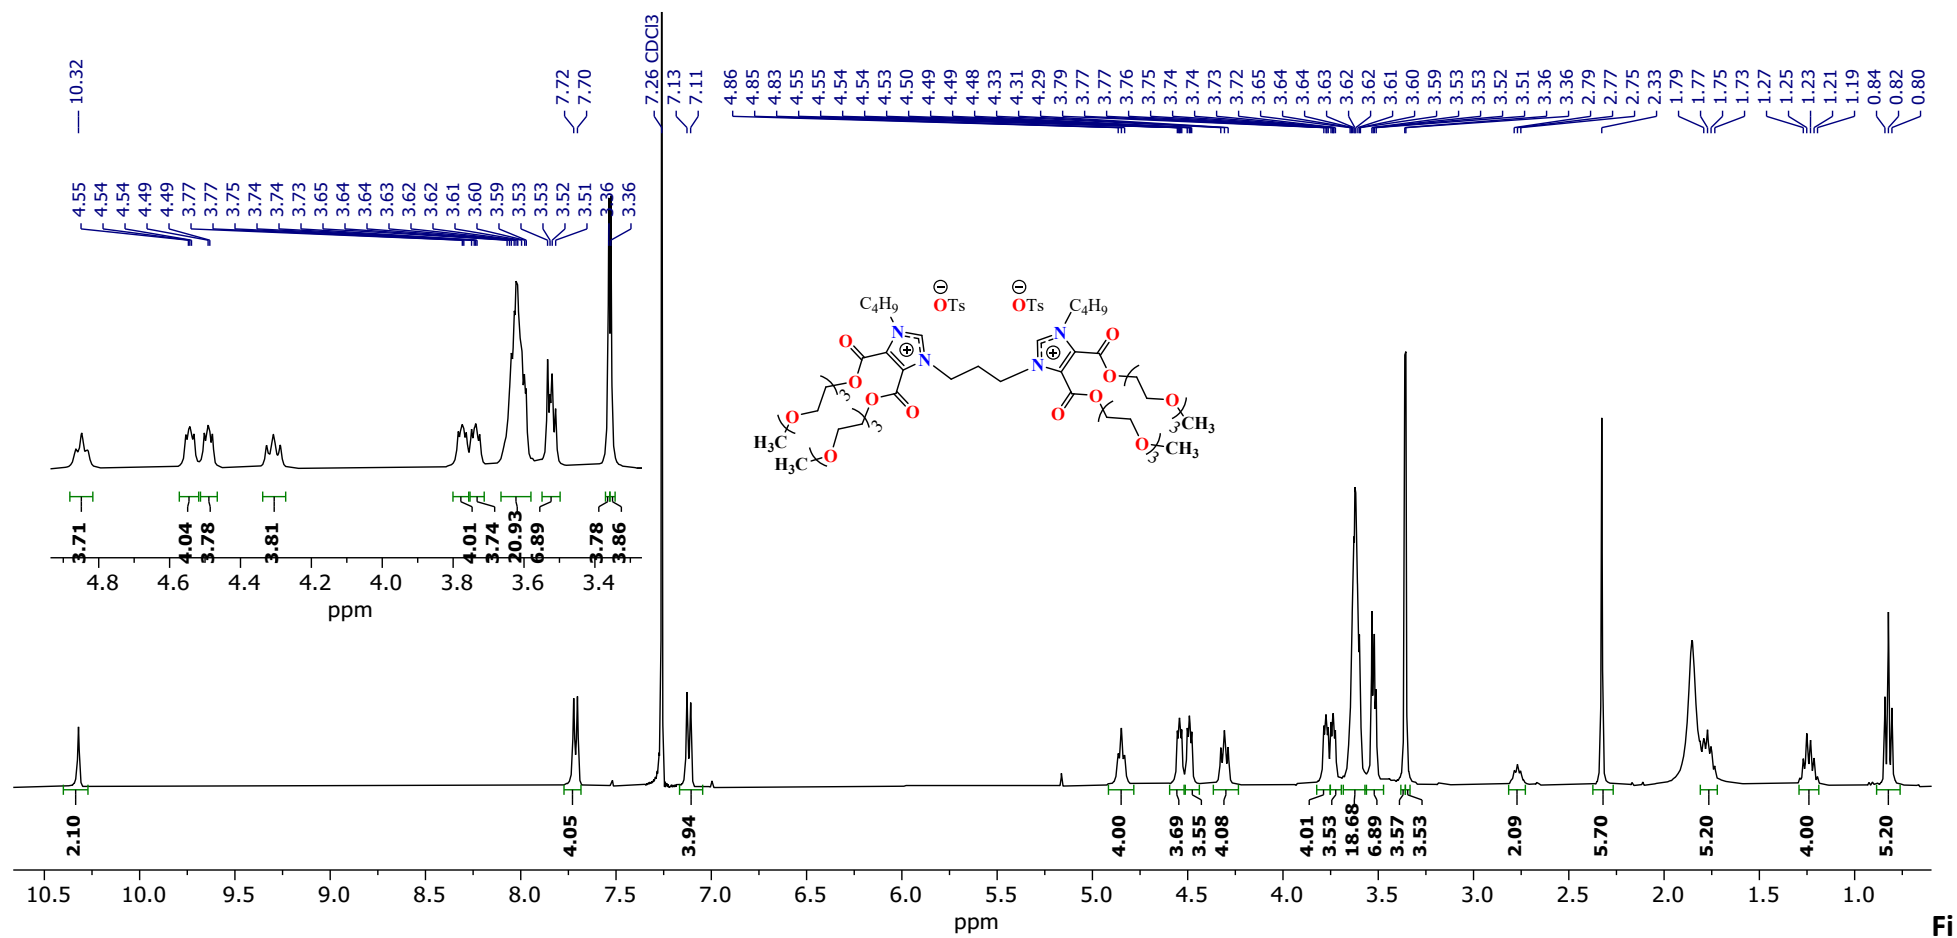

Figure S5. NMR  $^1\text{H}$  spectrum (400 MHz,  $\text{CDCl}_3$ , 25  $^\circ\text{C}$ ) of bis-imidazolium salt **4**

Fi



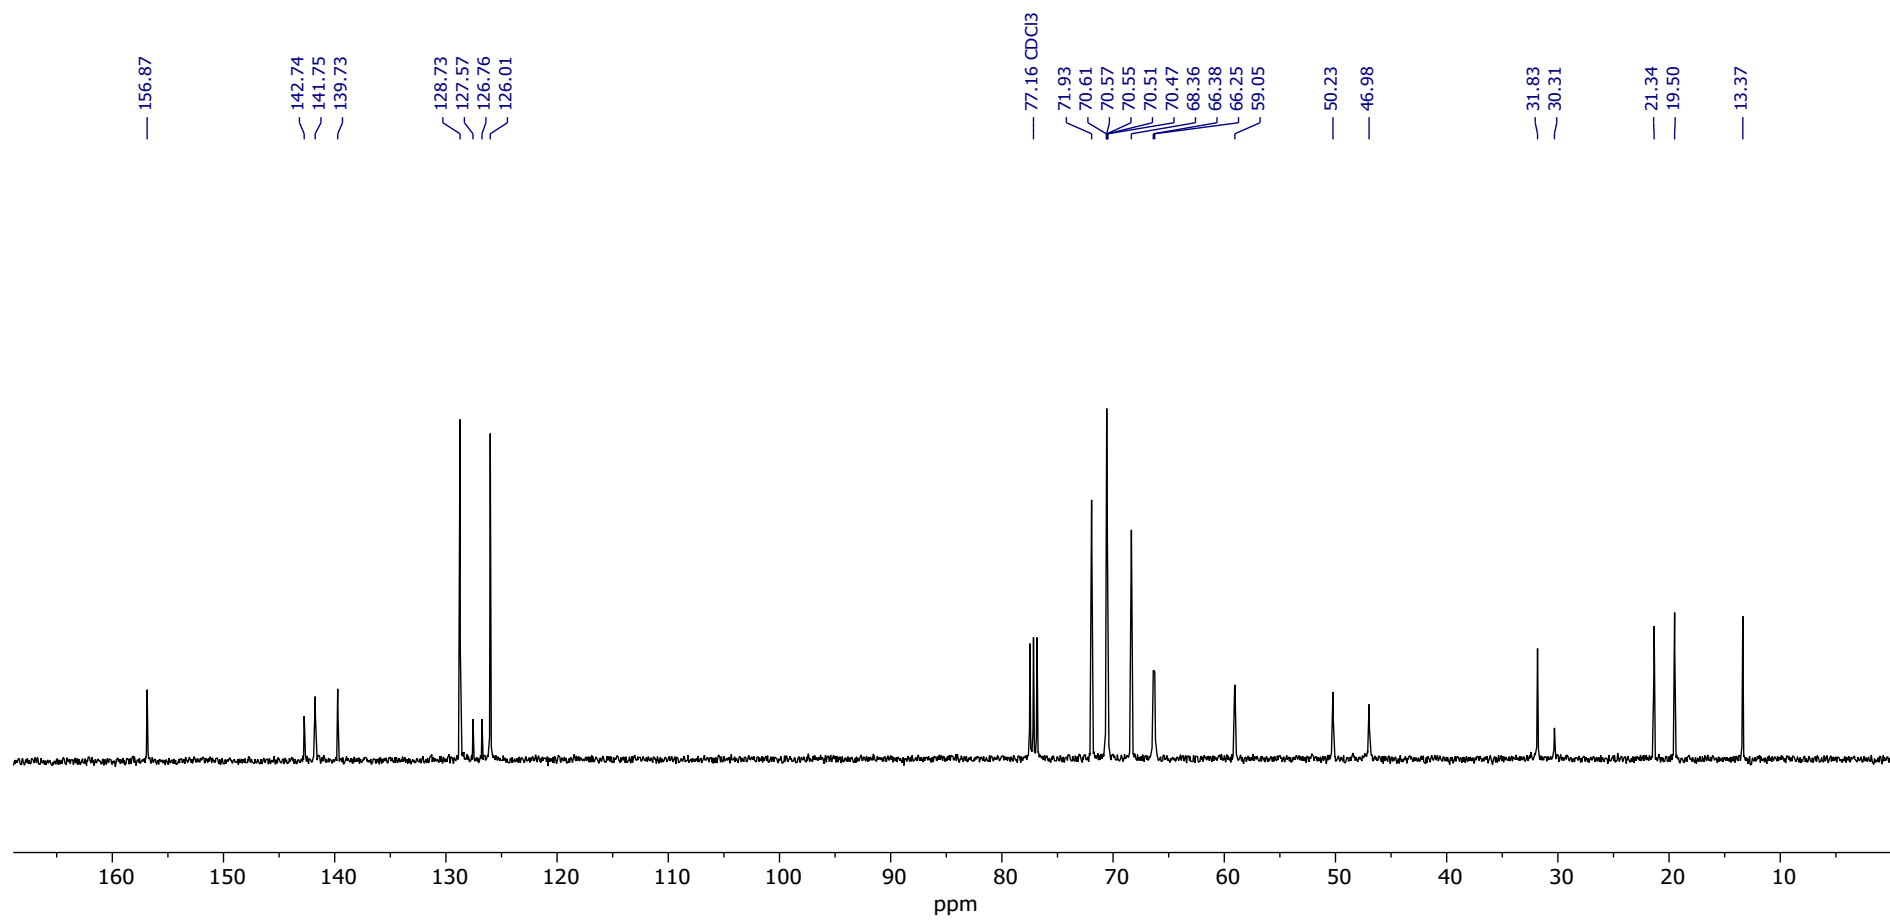

**Figure S6.** NMR <sup>13</sup>C spectrum (100.6 MHz, CDCl<sub>3</sub>, 25 °C) of bis-imidazolium salt **4**

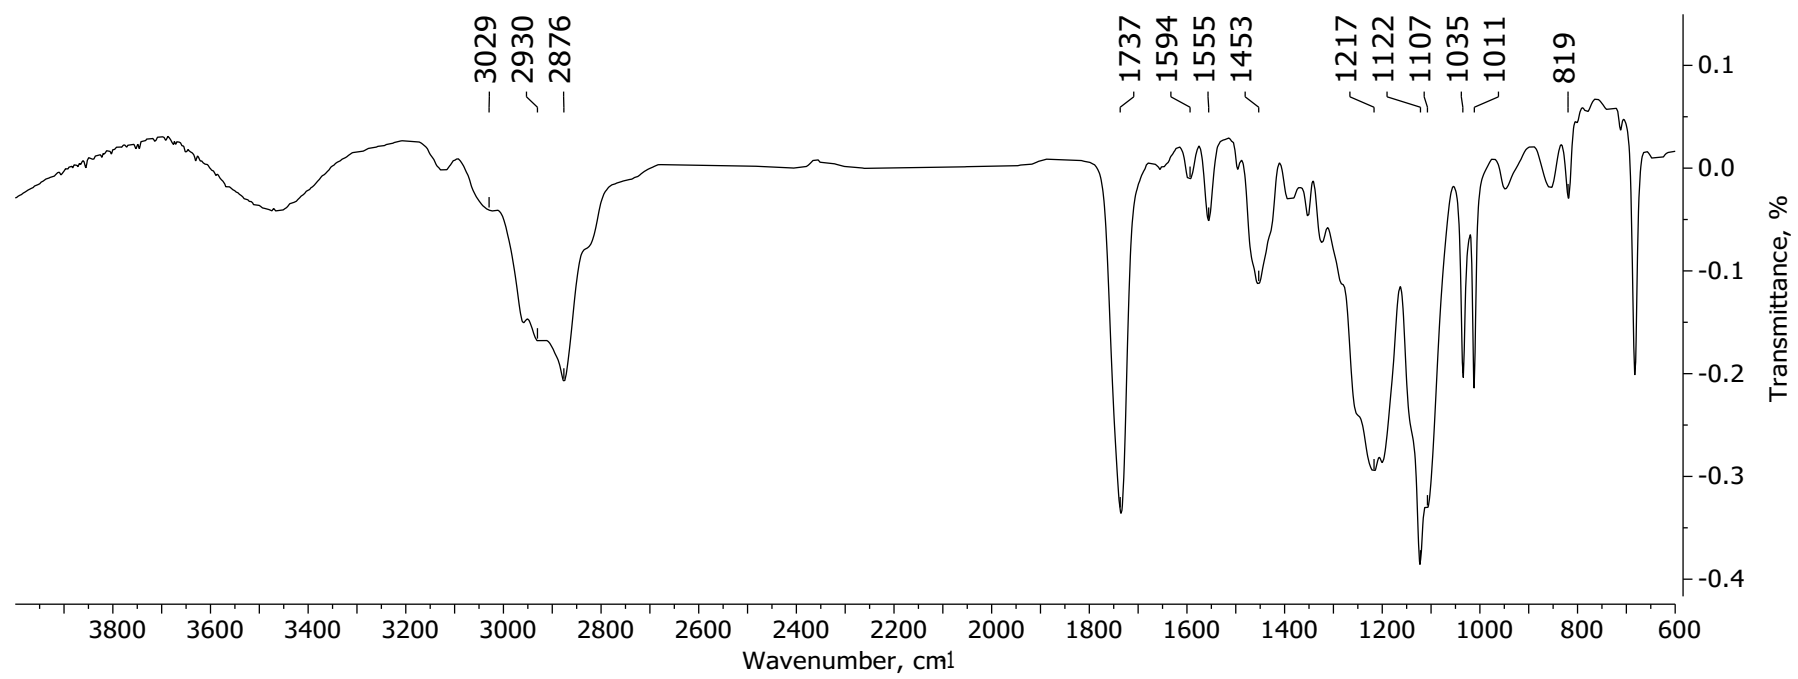

**Figure S7.** FT-IR spectrum of bis-imidazolium salt **4**

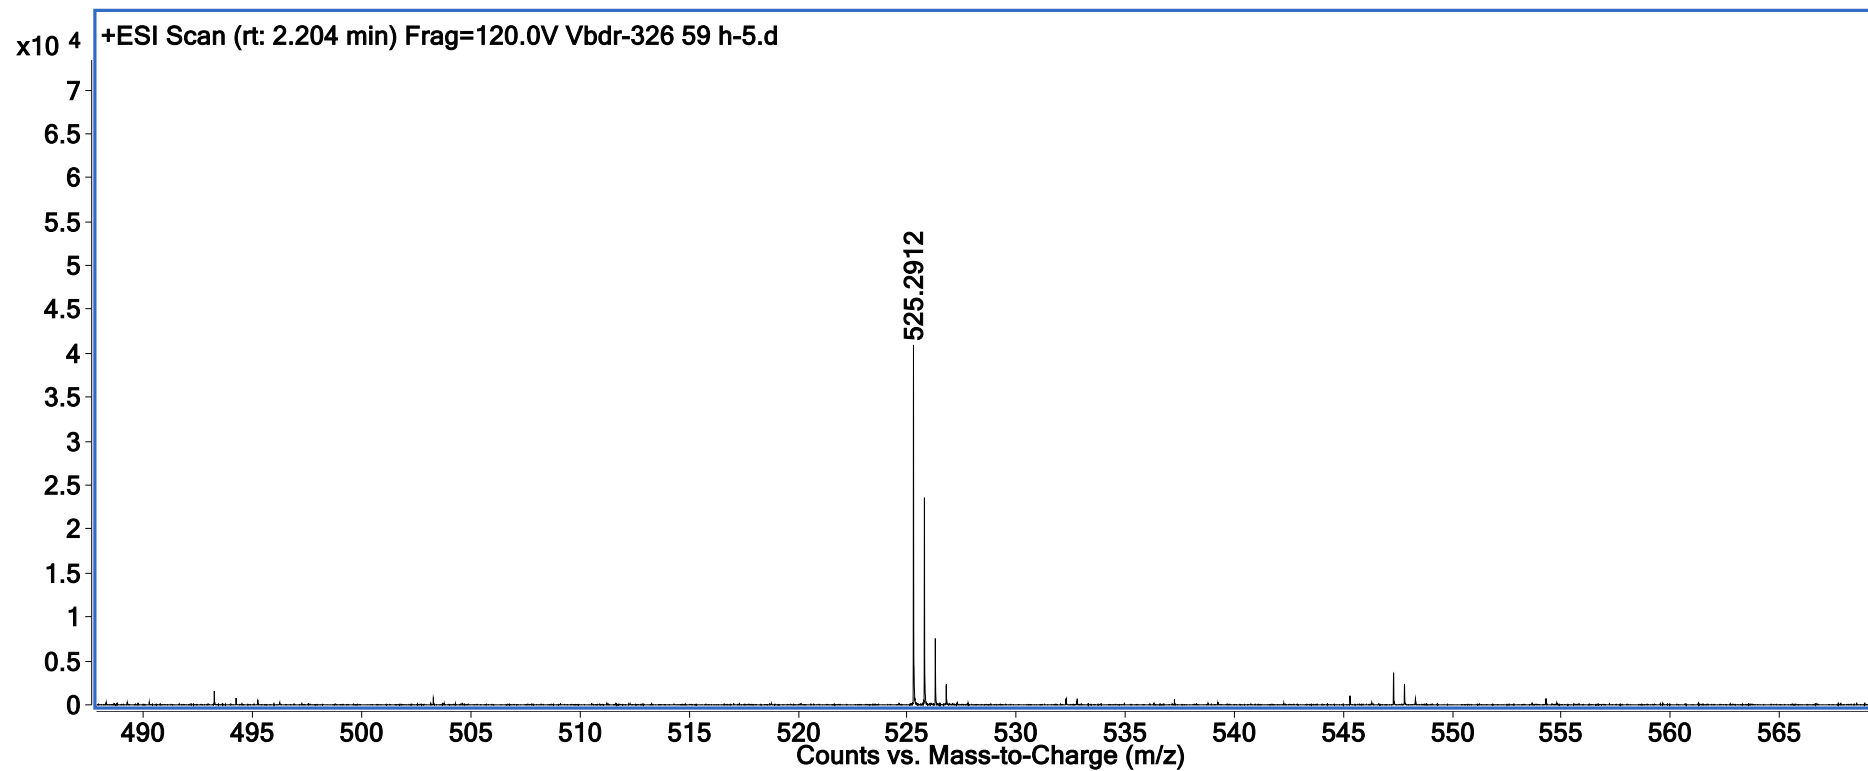

**Figure S8.** HR-ESI mass-spectrum of bis-imidazolium salt **4**

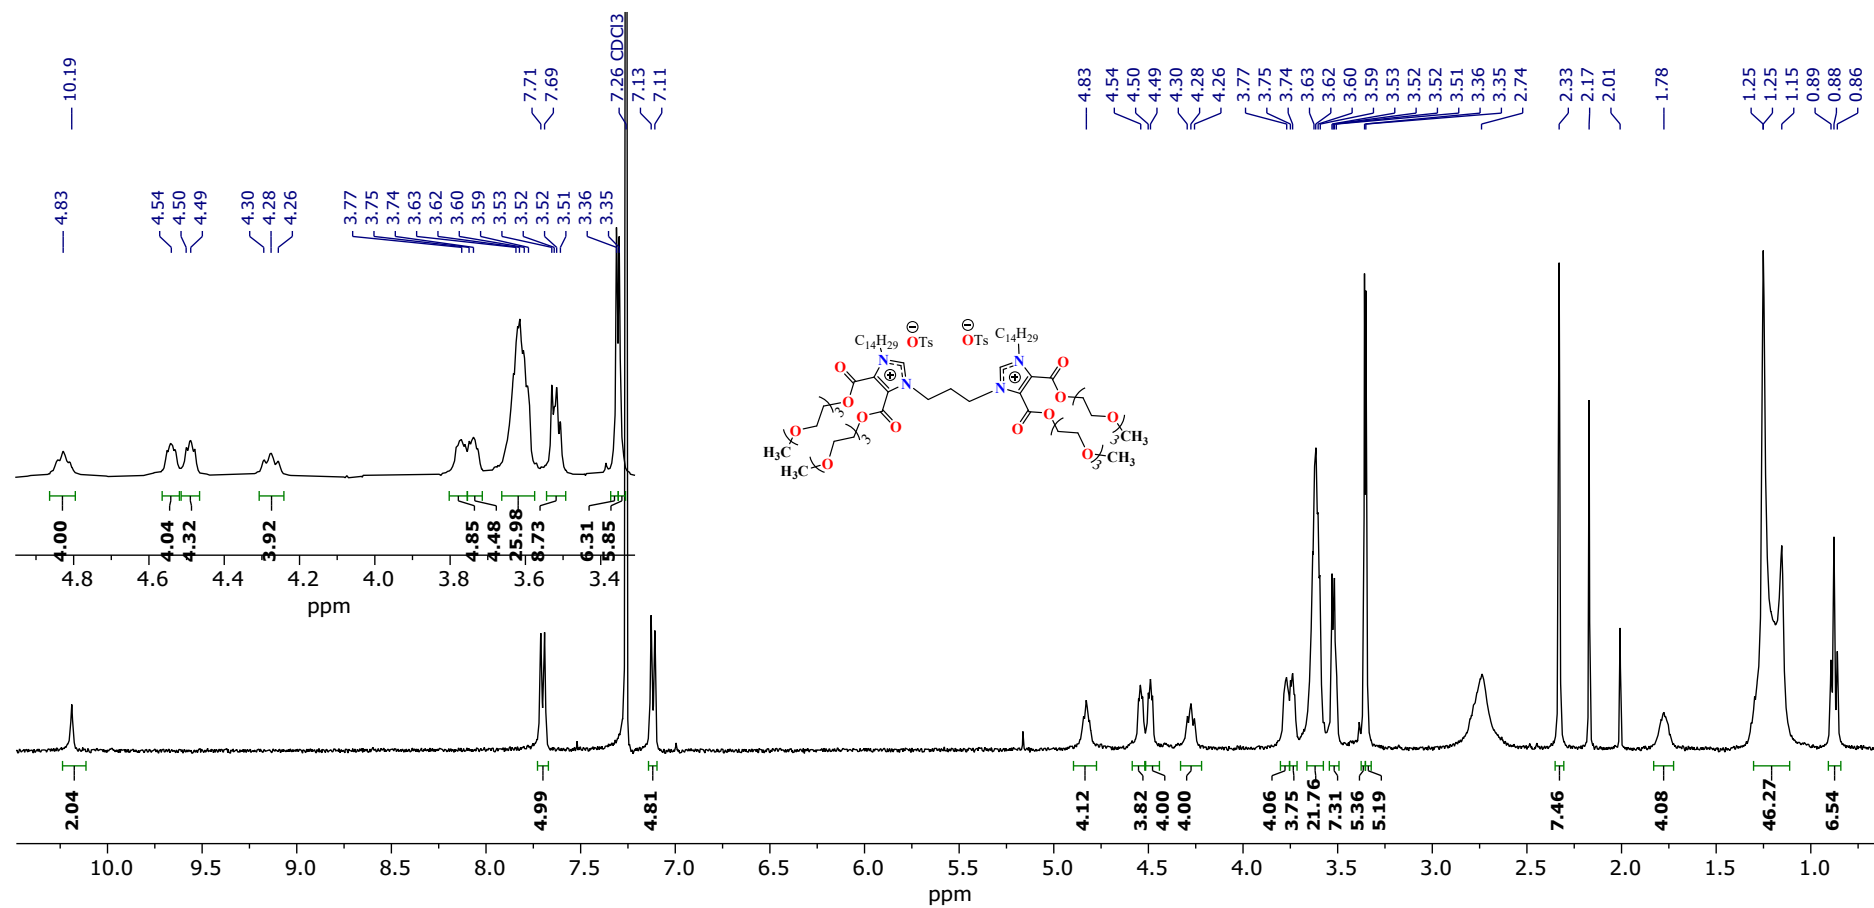

Figure S9. NMR <sup>1</sup>H spectrum (400 MHz, CDCl<sub>3</sub>, 25 °C) of bis-imidazolium salt 5

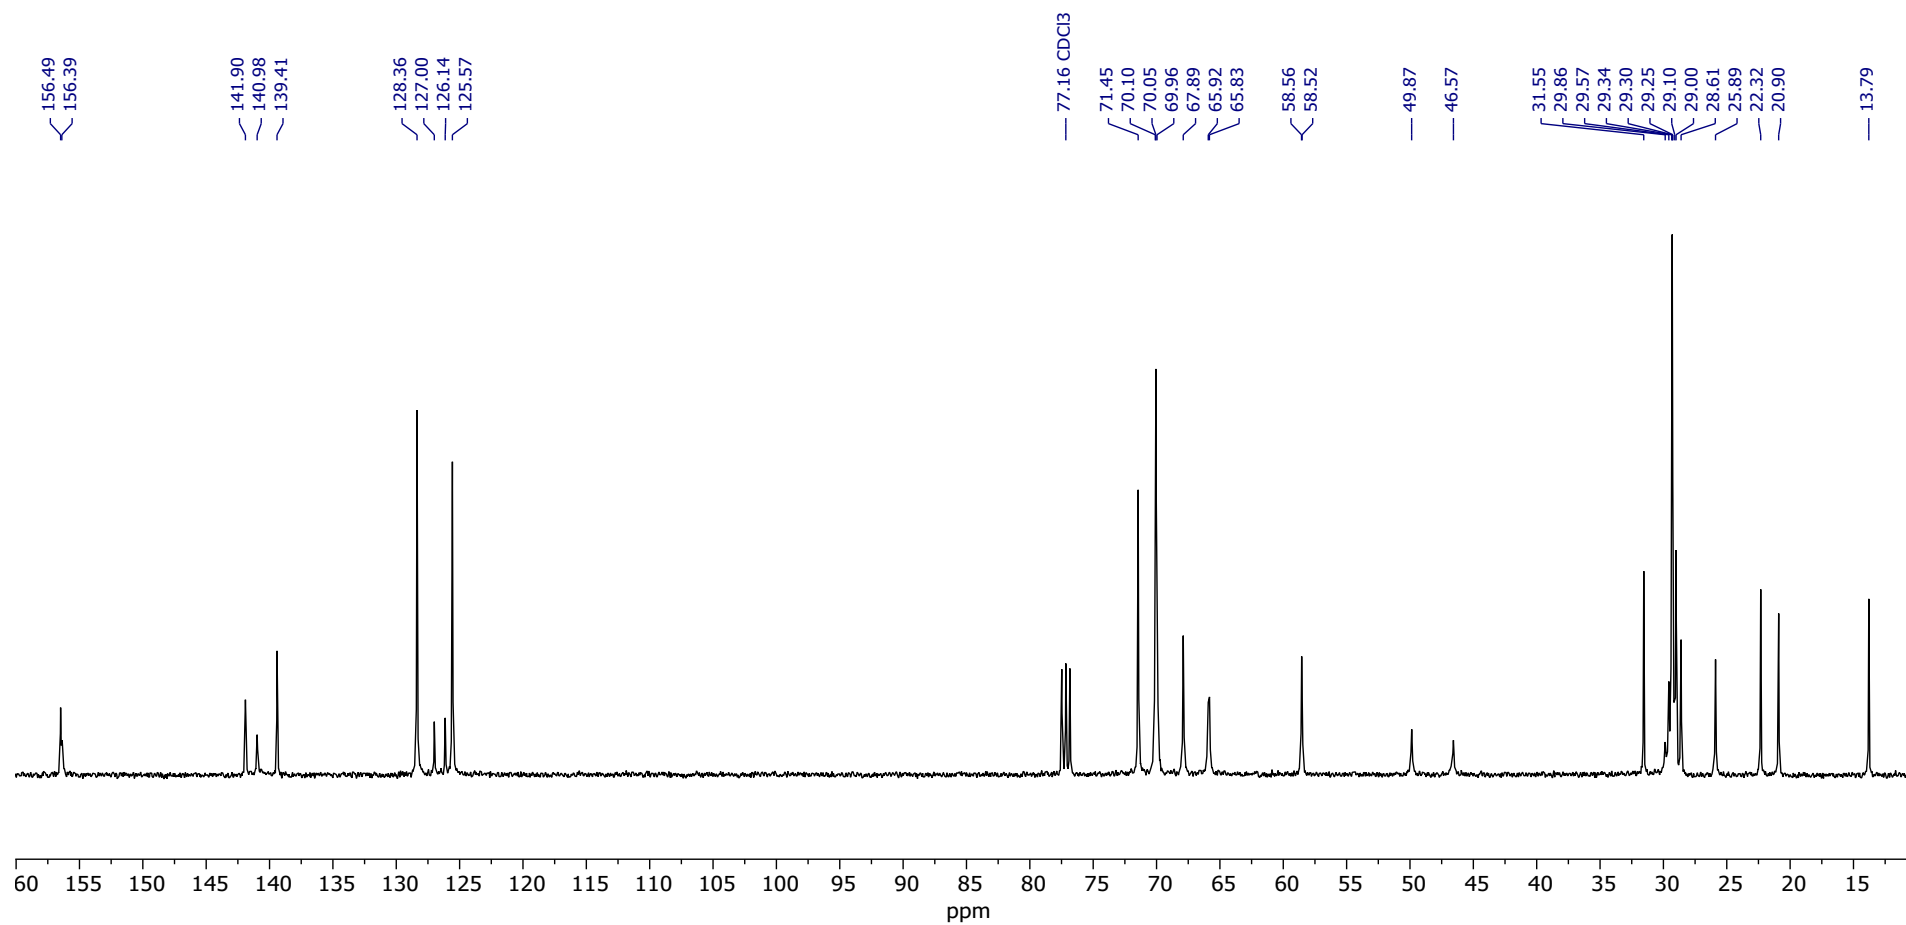

**Figure S10.** NMR <sup>13</sup>C spectrum (100.6 MHz, CDCl<sub>3</sub>, 25 °C) of bis-imidazolium salt **5**

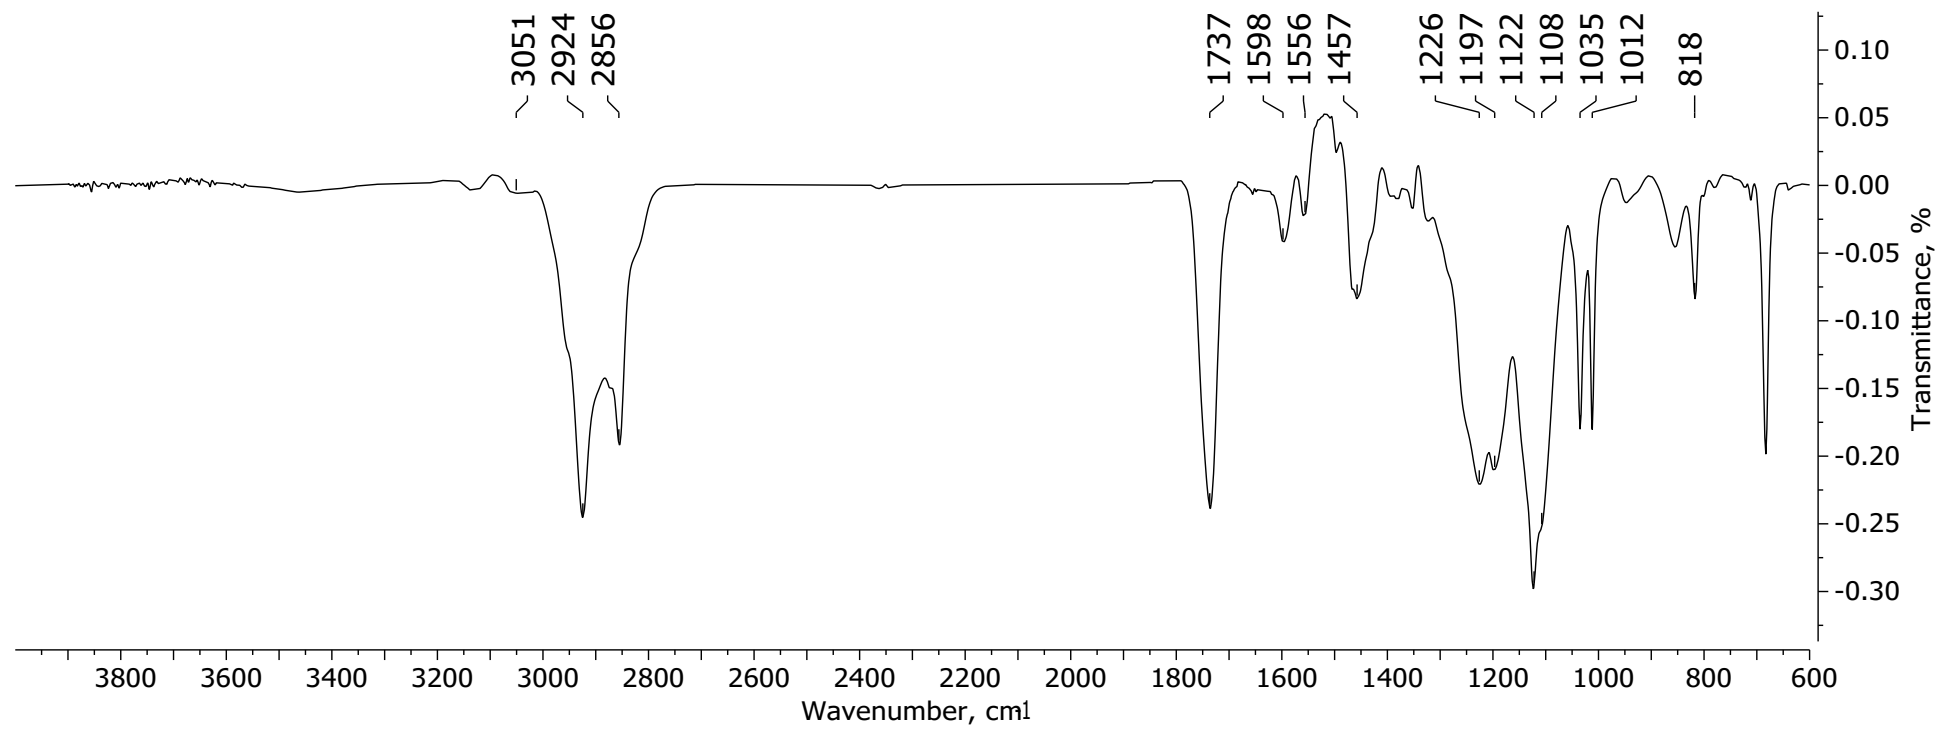

**Figure S11.** FT-IR spectrum of bis-imidazolium salt 5

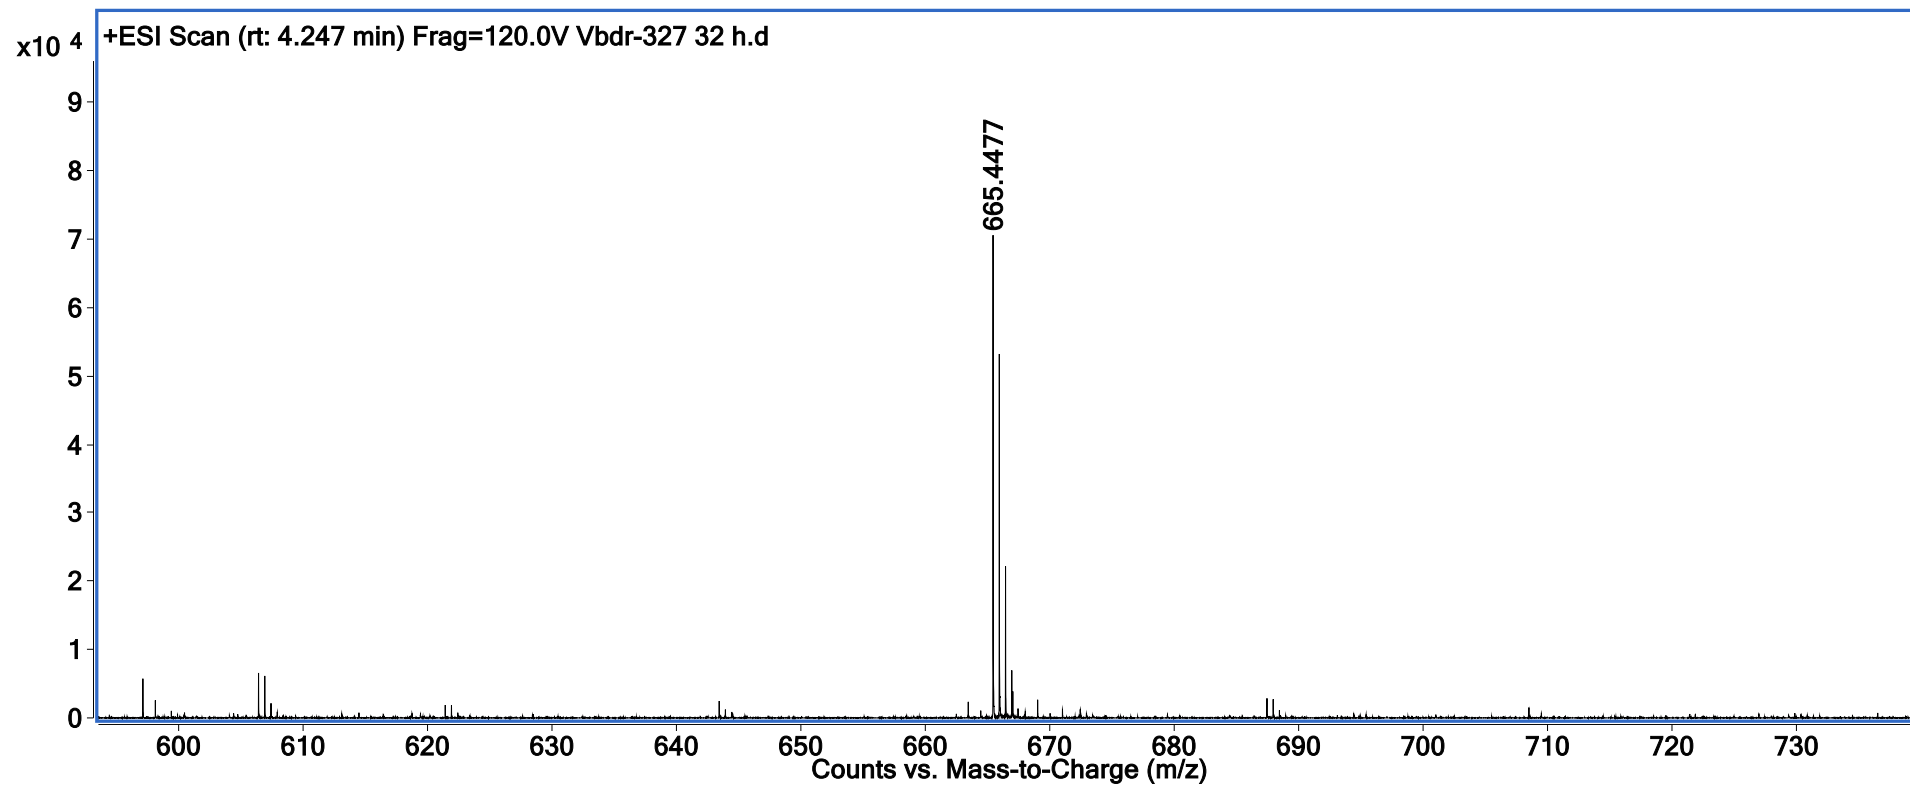

Figure S12. HR-ESI mass-spectrum of bis-imidazolium salt 5

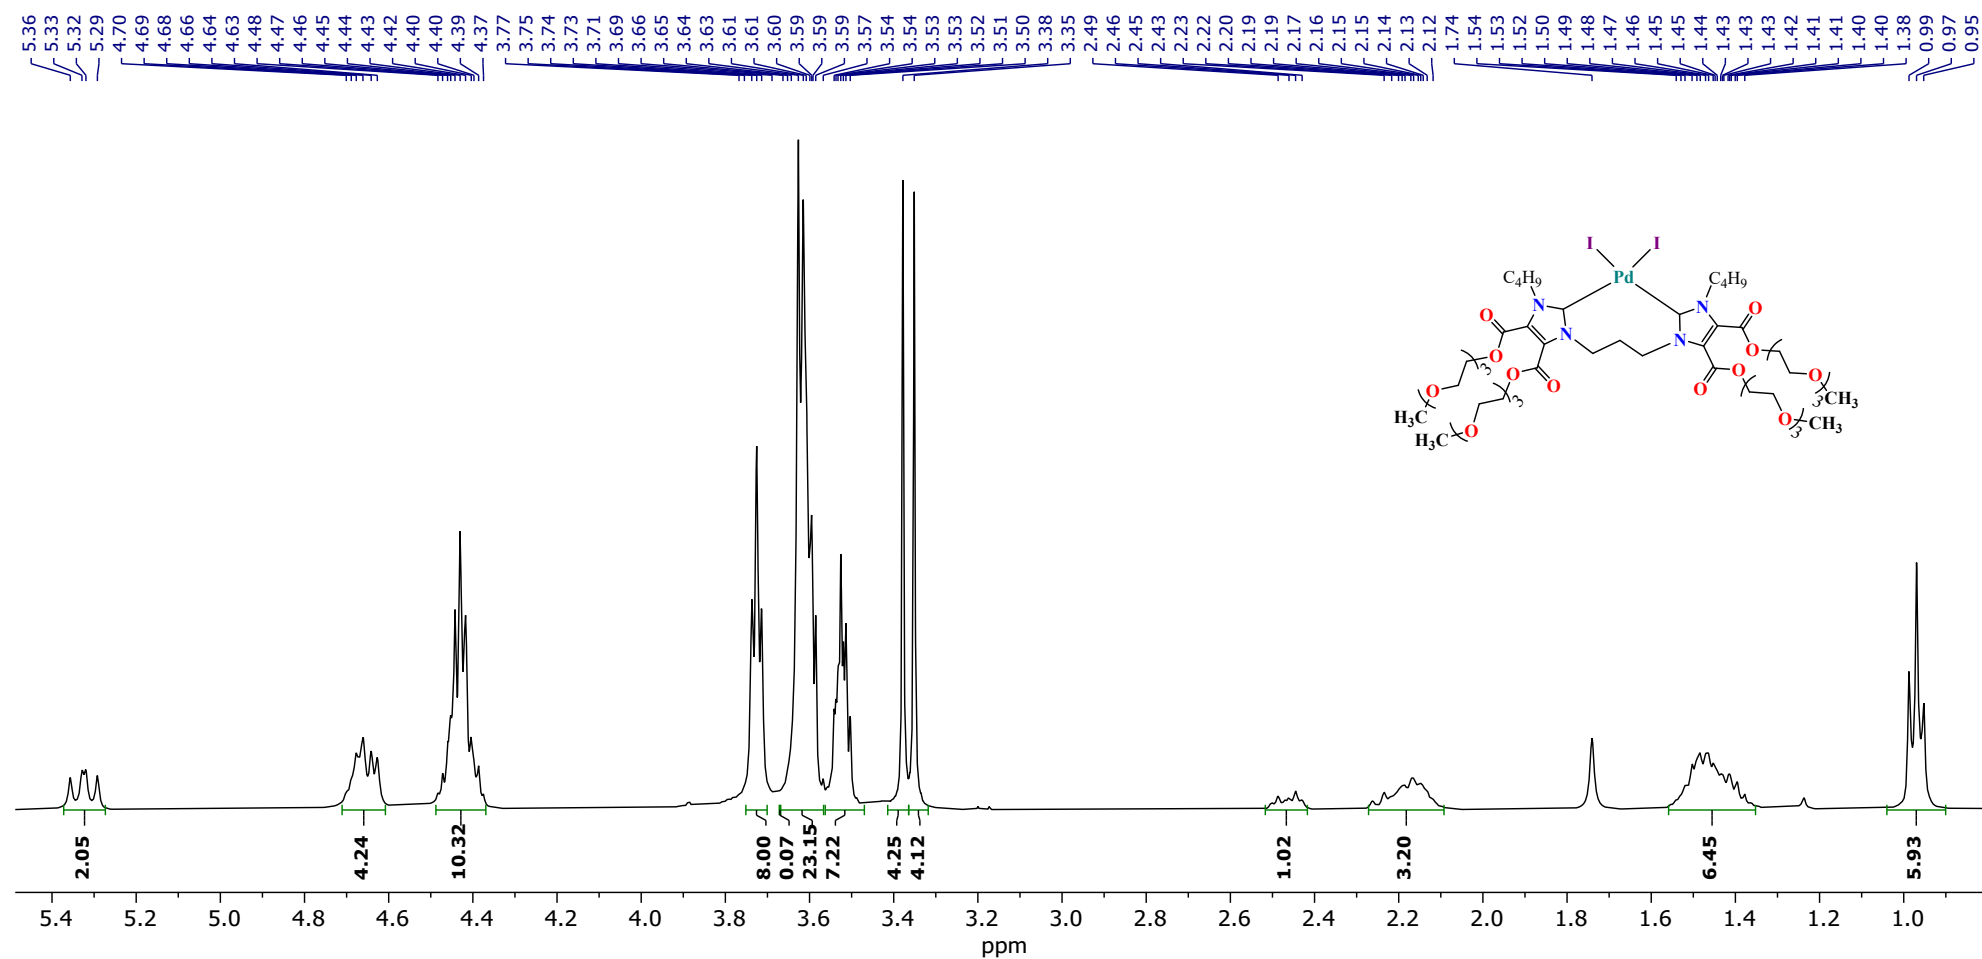

Figure S13. NMR <sup>1</sup>H spectrum (400 MHz, CDCl<sub>3</sub>, 25 °C) of complex 6



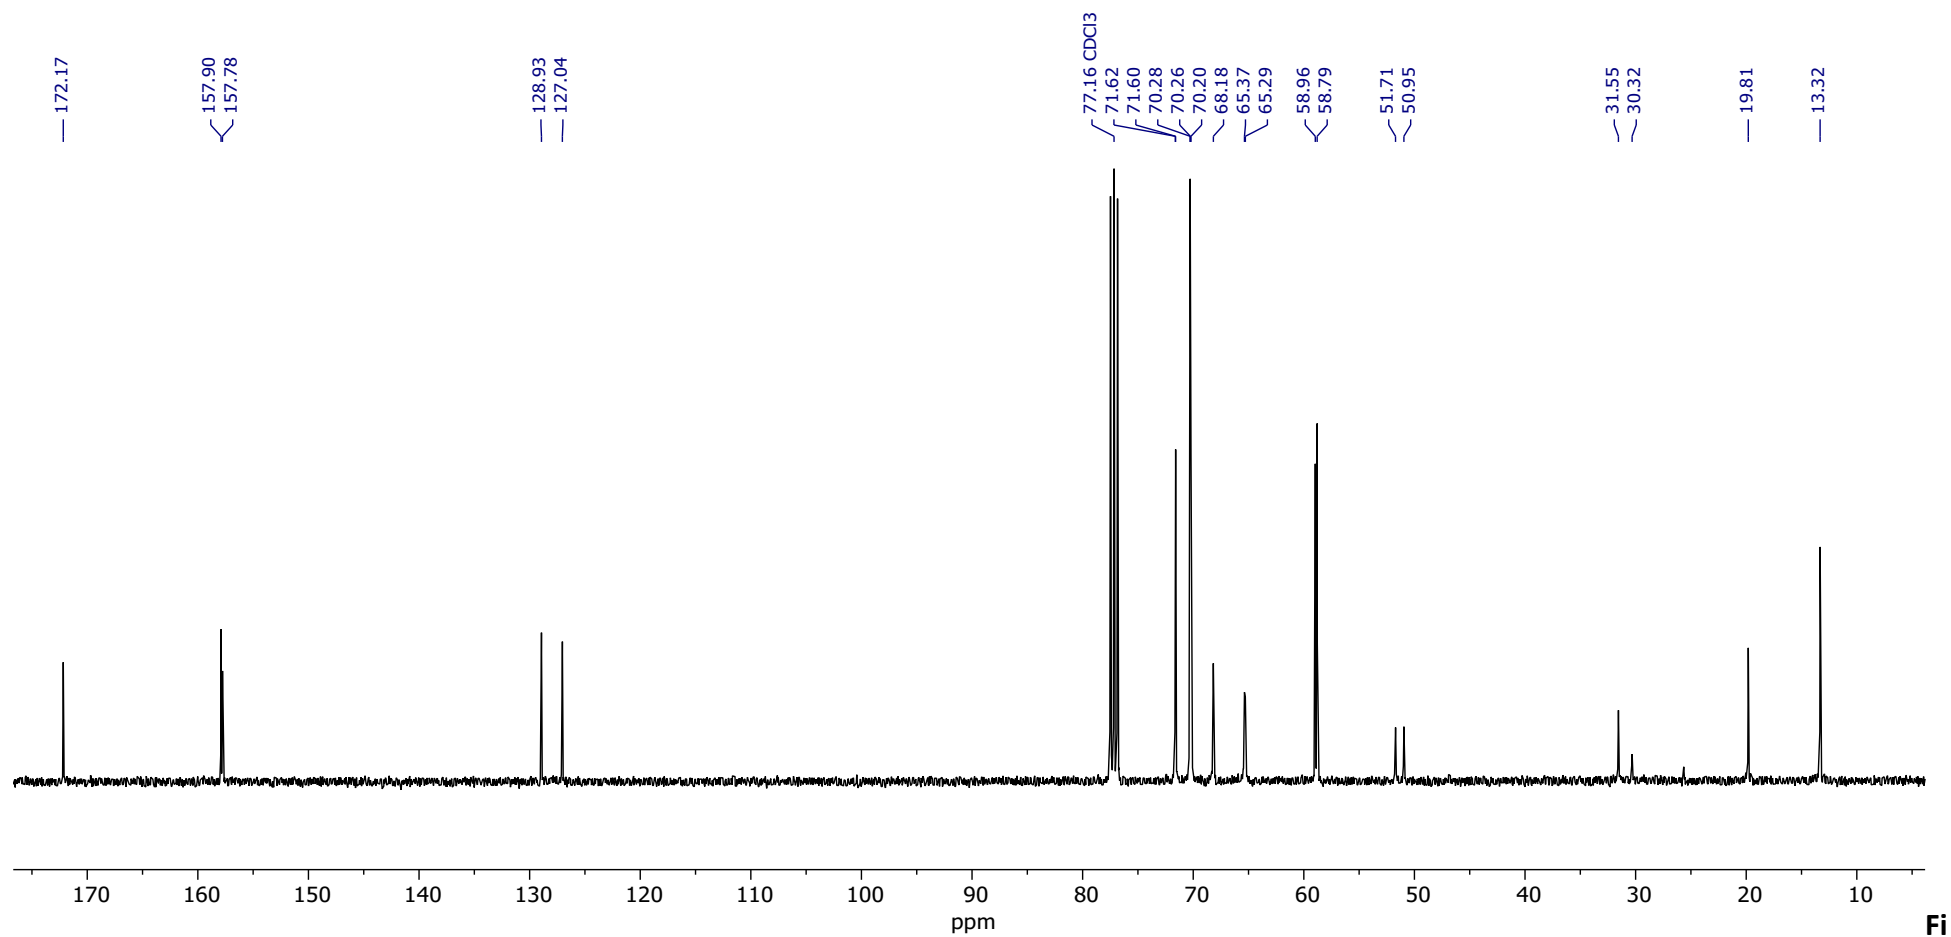

Figure S14.  $^{13}\text{C}$  NMR spectrum (100.6 MHz,  $\text{CDCl}_3$ , 25  $^\circ\text{C}$ ) of complex **6**

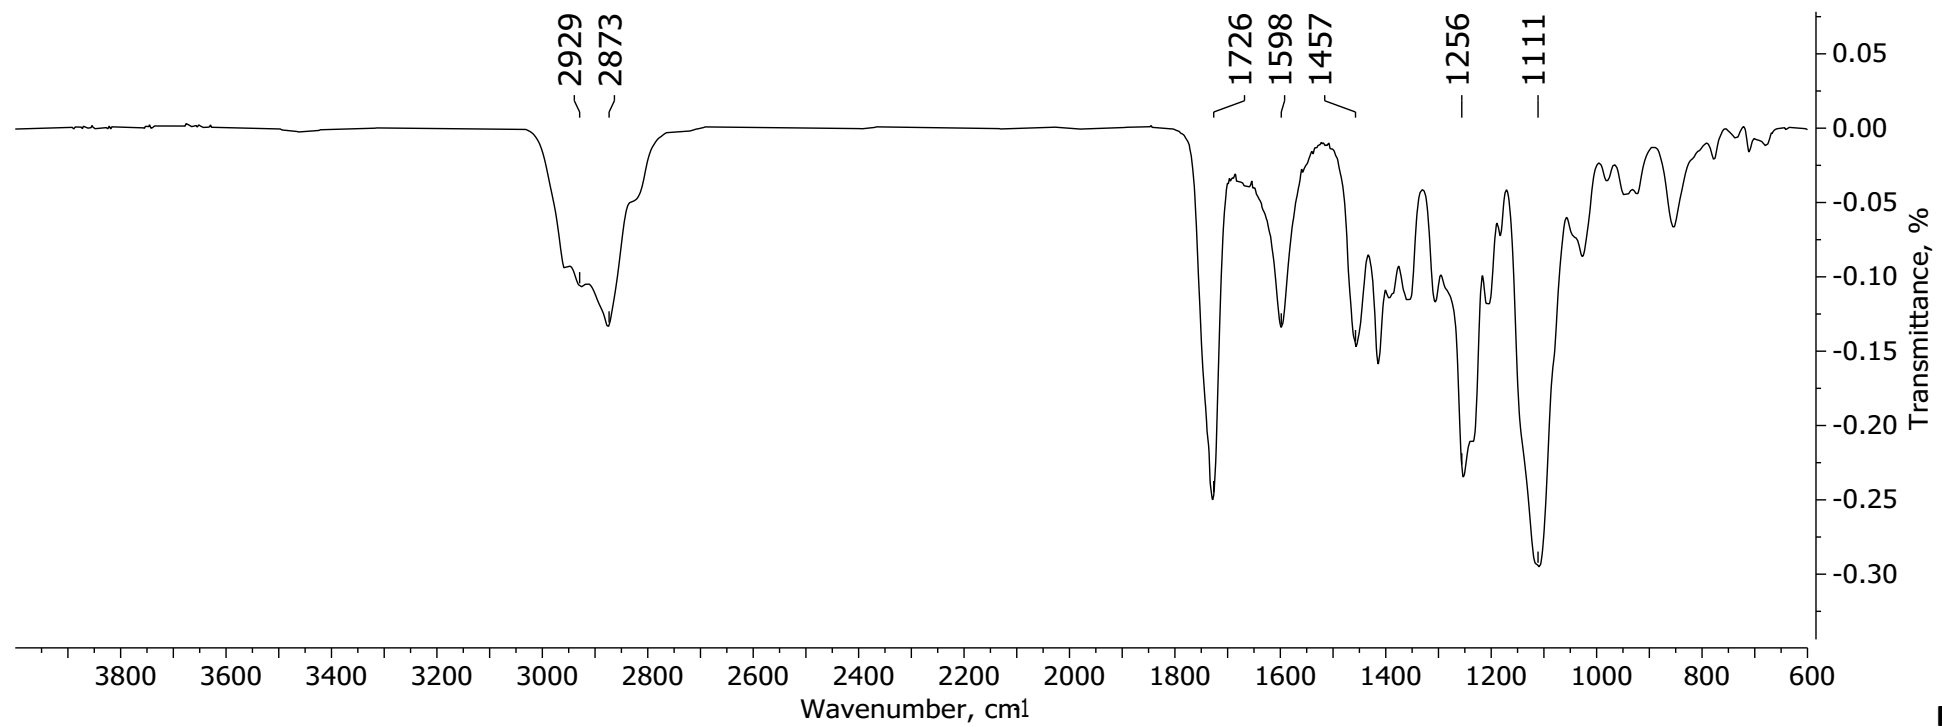

Figure S15. FT-IR spectrum of complex 6

Fi

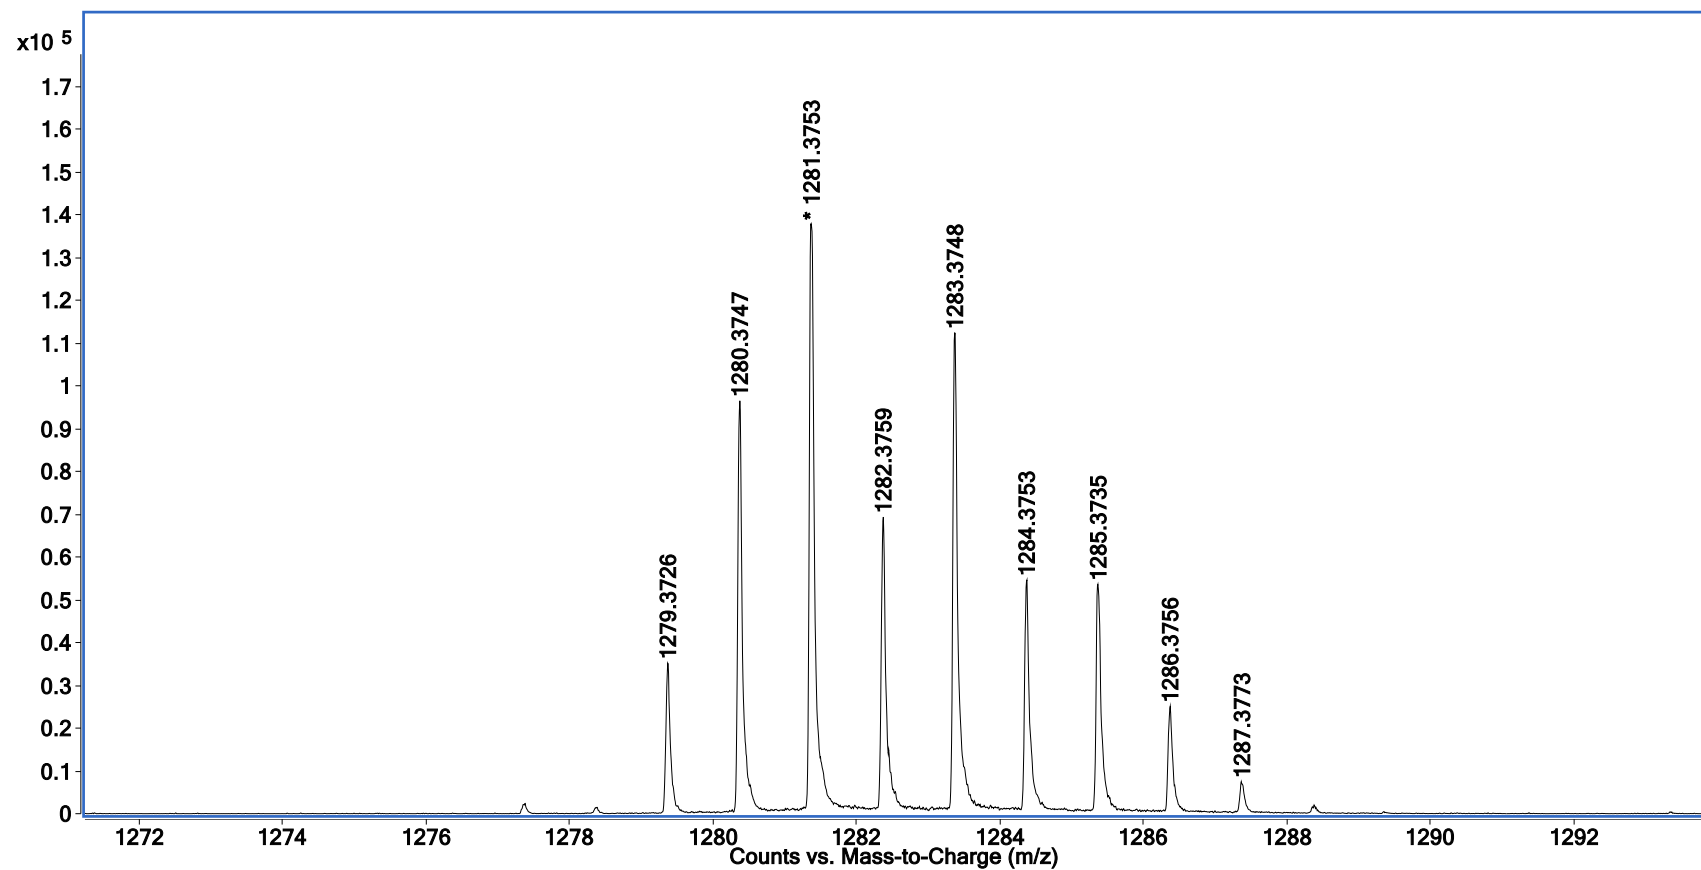

Figure S16. HR-ESI mass-spectrum of complex 6

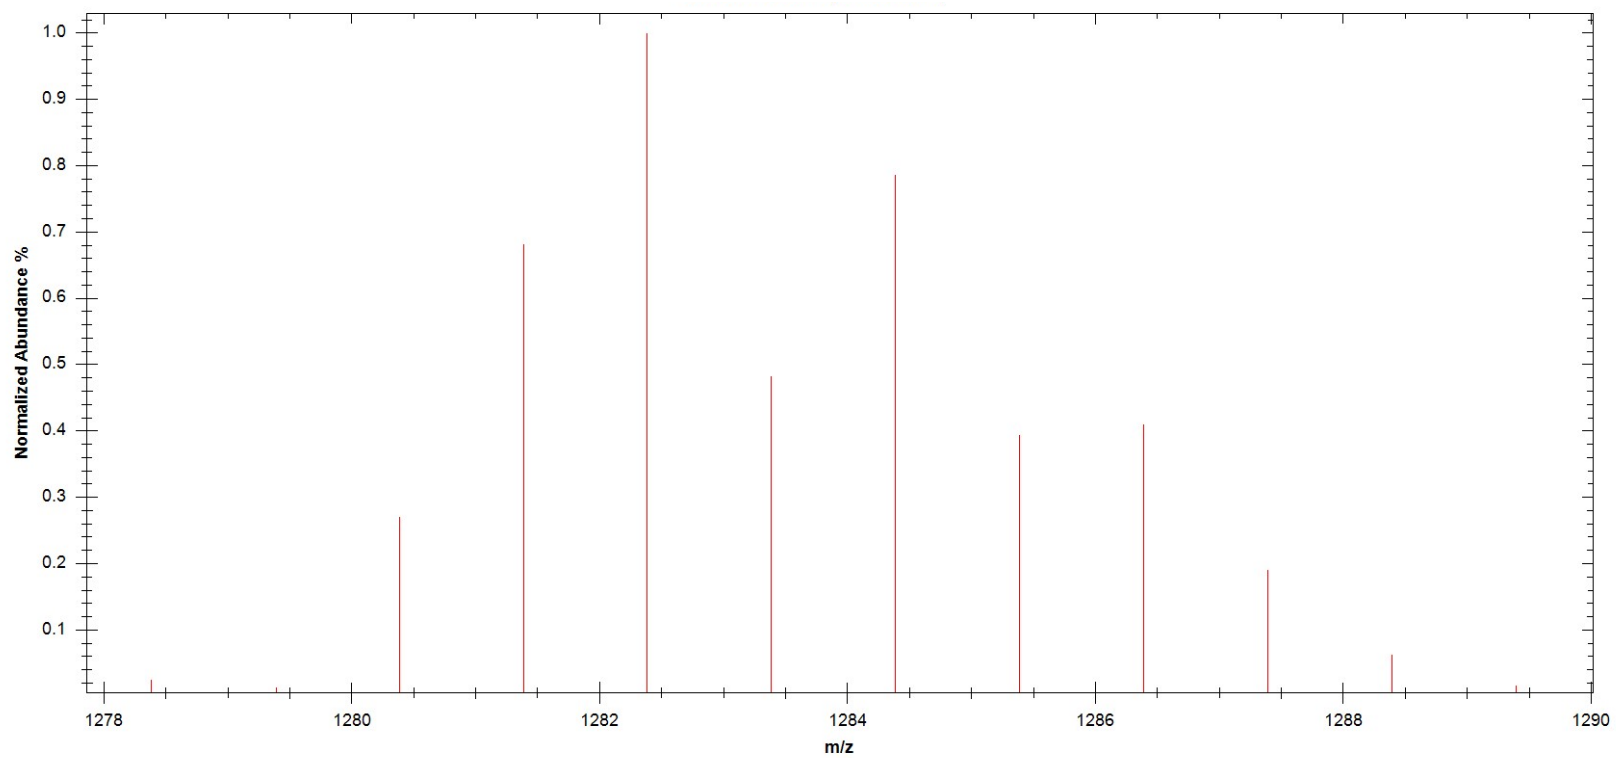

**Figure S17.** Calculated isotopic distribution for complex 6 ( $[M-I]^+$ ,  $C_{49}H_{84}IN_4O_{20}Pd^+$ )

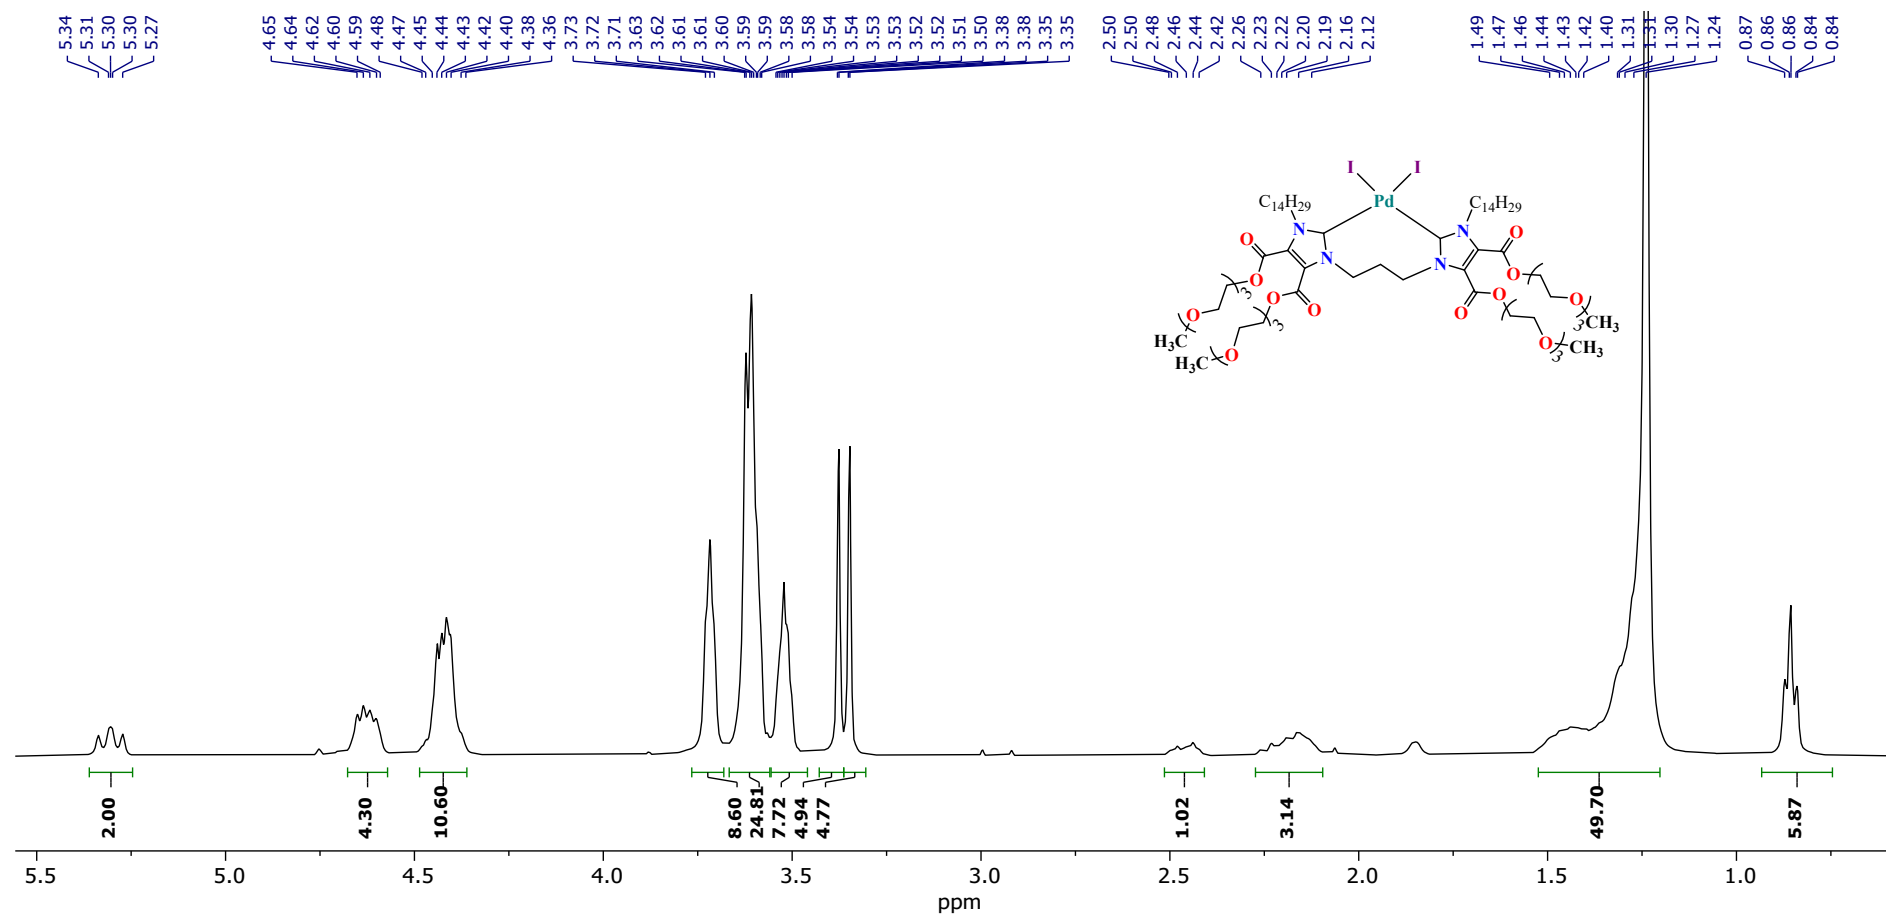

Figure S18. NMR <sup>1</sup>H spectrum (400 MHz, CDCl<sub>3</sub>, 25 °C) of complex 7

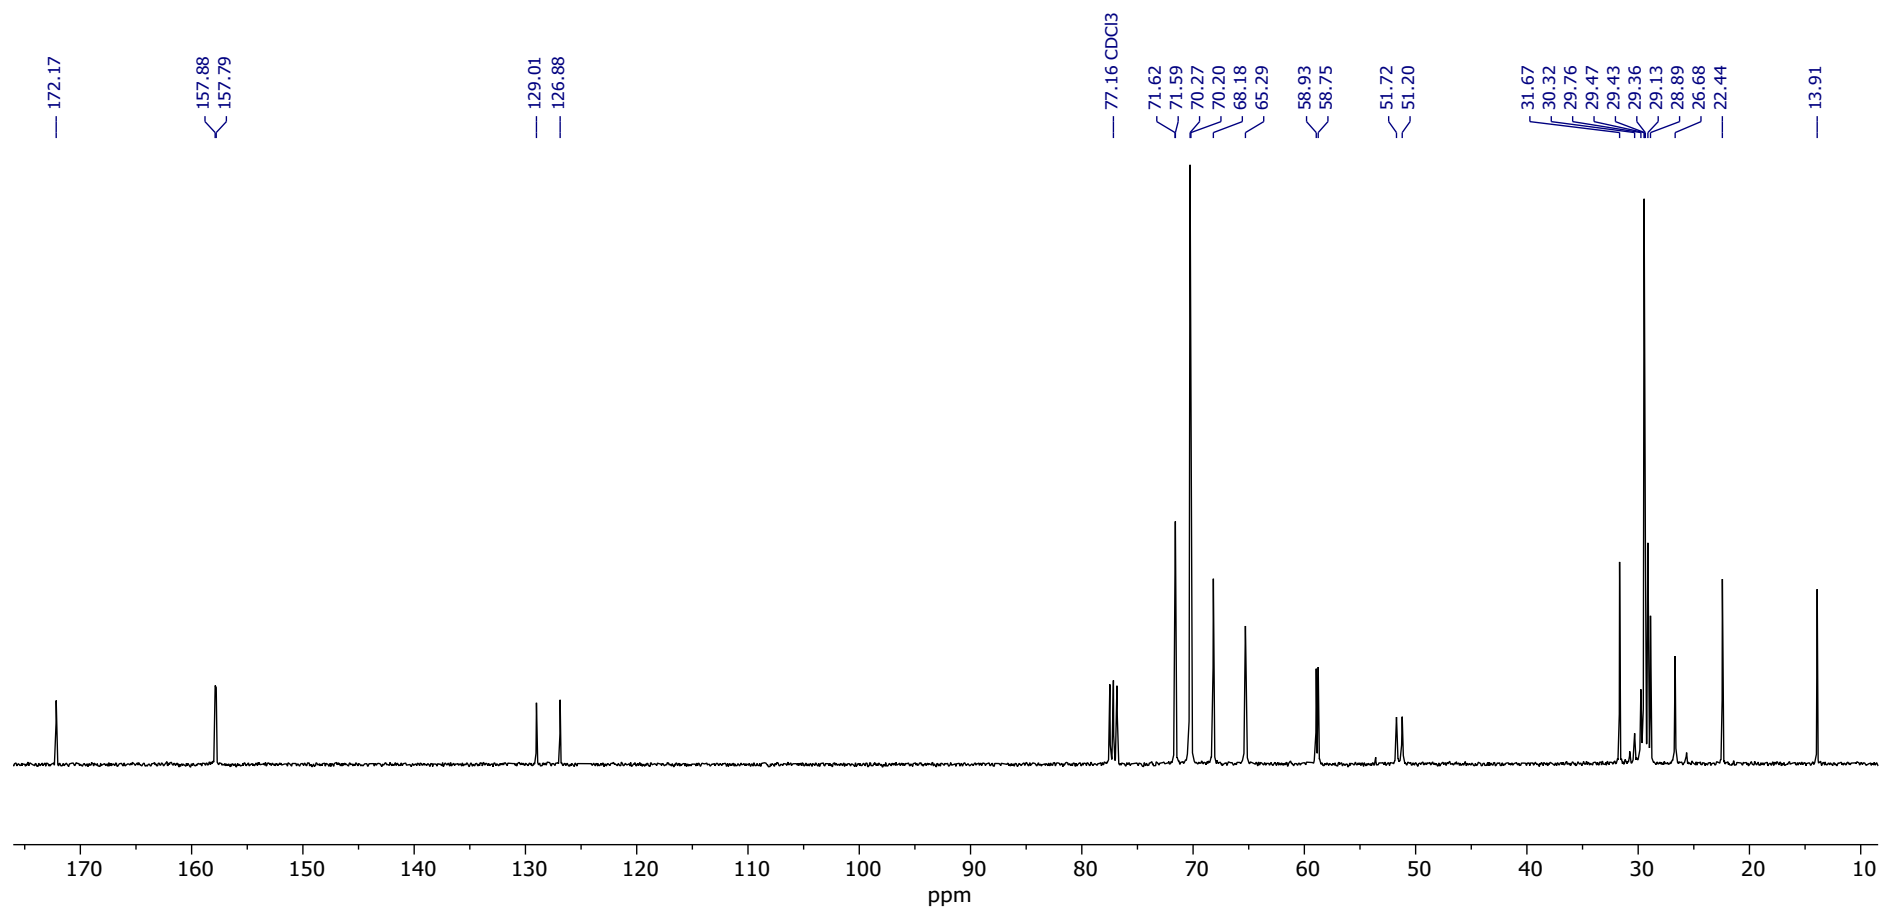

**Figure S19.** NMR  $^{13}\text{C}$  spectrum (100.6 MHz,  $\text{CDCl}_3$ , 25  $^\circ\text{C}$ ) of complex **7**

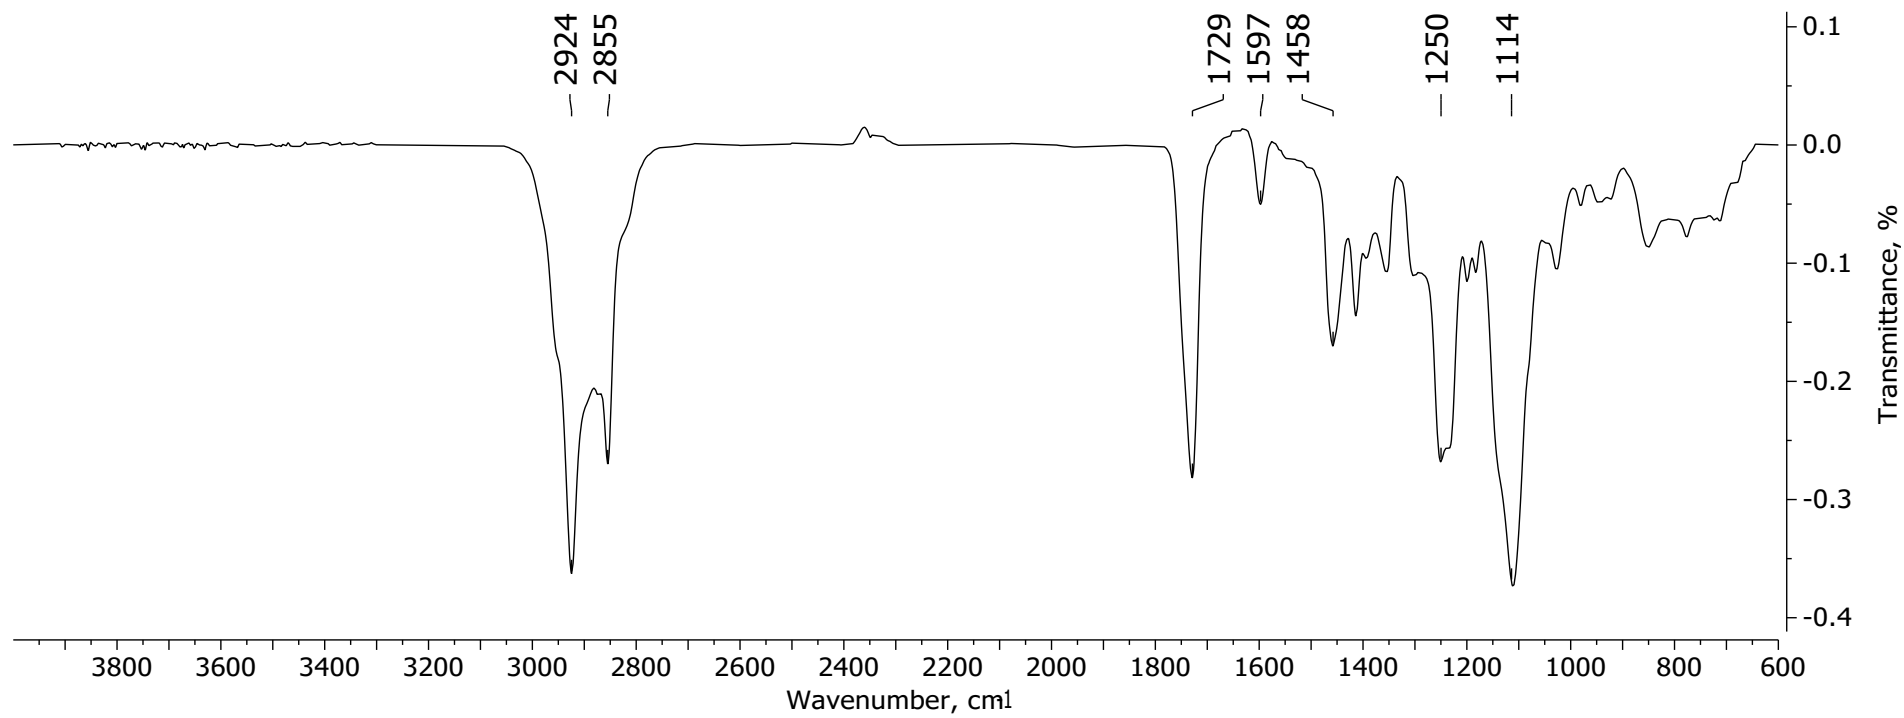

Figure S20. FT-IR spectrum of complex 7

Fig

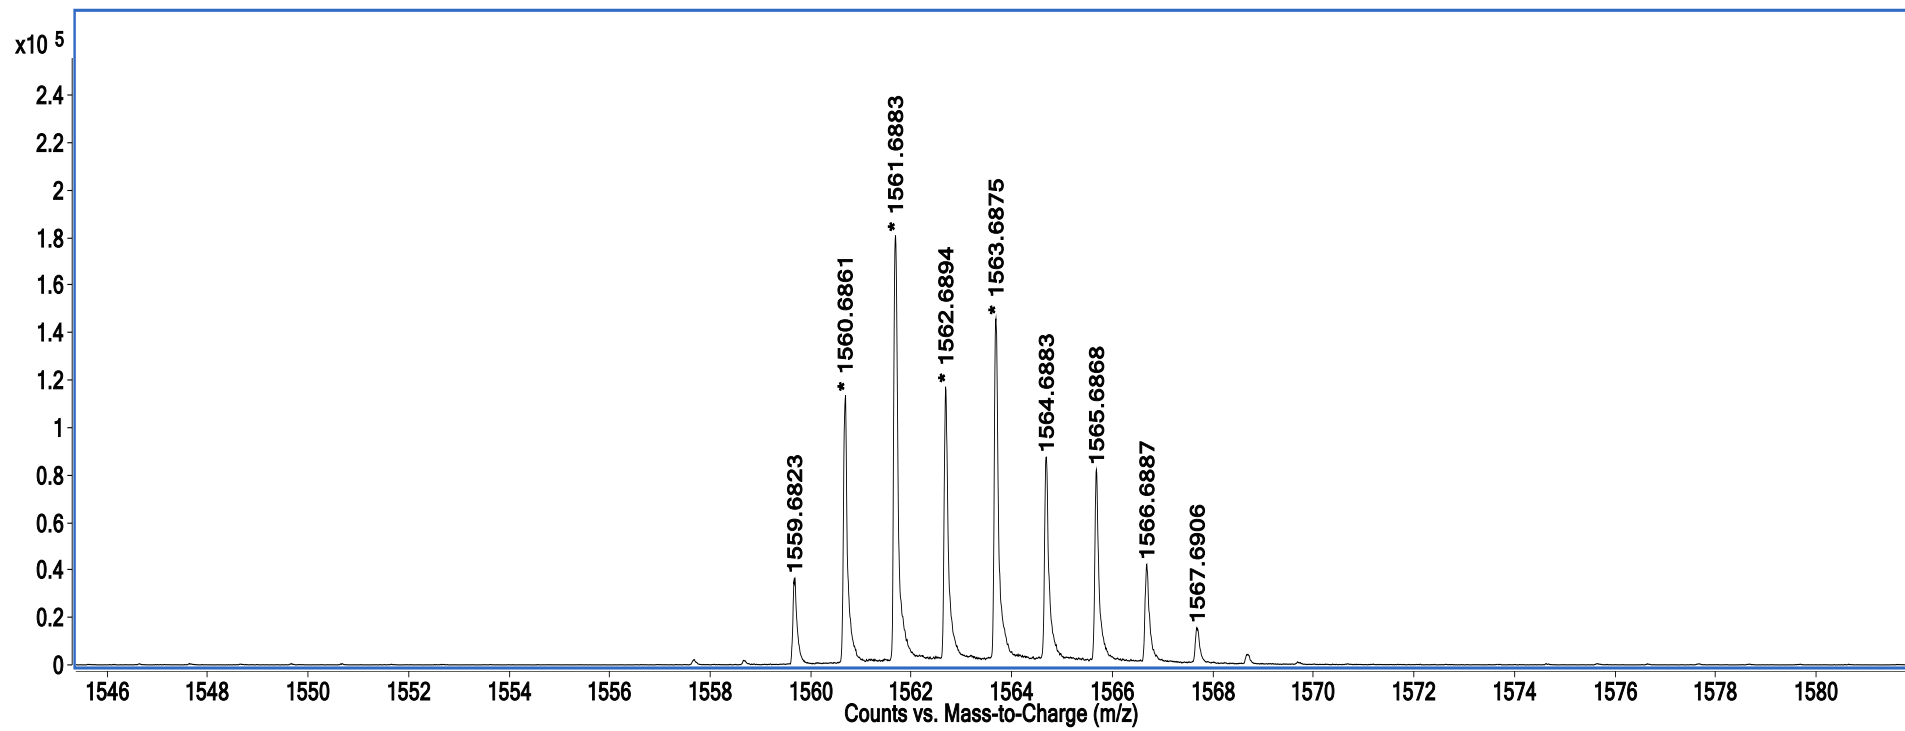

Figure S17. HR-ESI mass-spectrum of complex 7



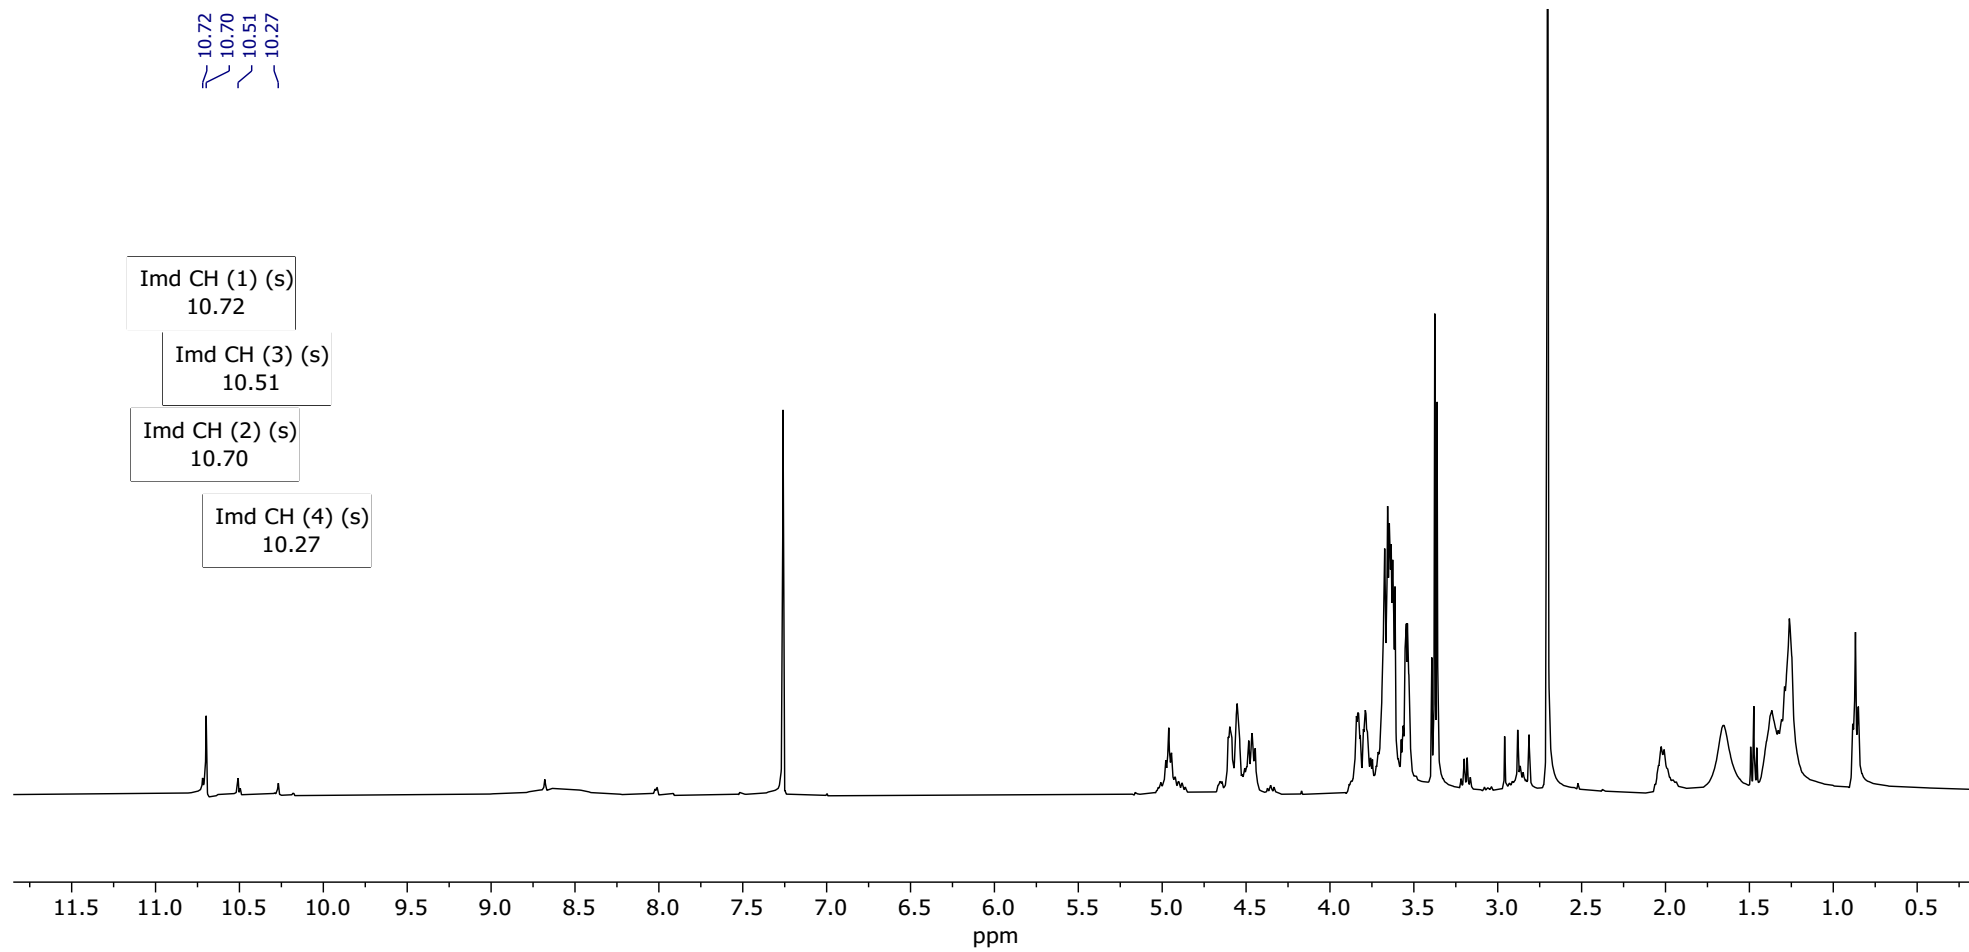

S25

**Figure S18.** NMR  $^1\text{H}$  spectrum (400 MHz,  $\text{CDCl}_3$ , 25  $^\circ\text{C}$ ) of the reaction mixture of bis-imidazolium salt **2** with 1-iodooctane after 150 h reaction time (60 $^\circ\text{C}$  in DMF).

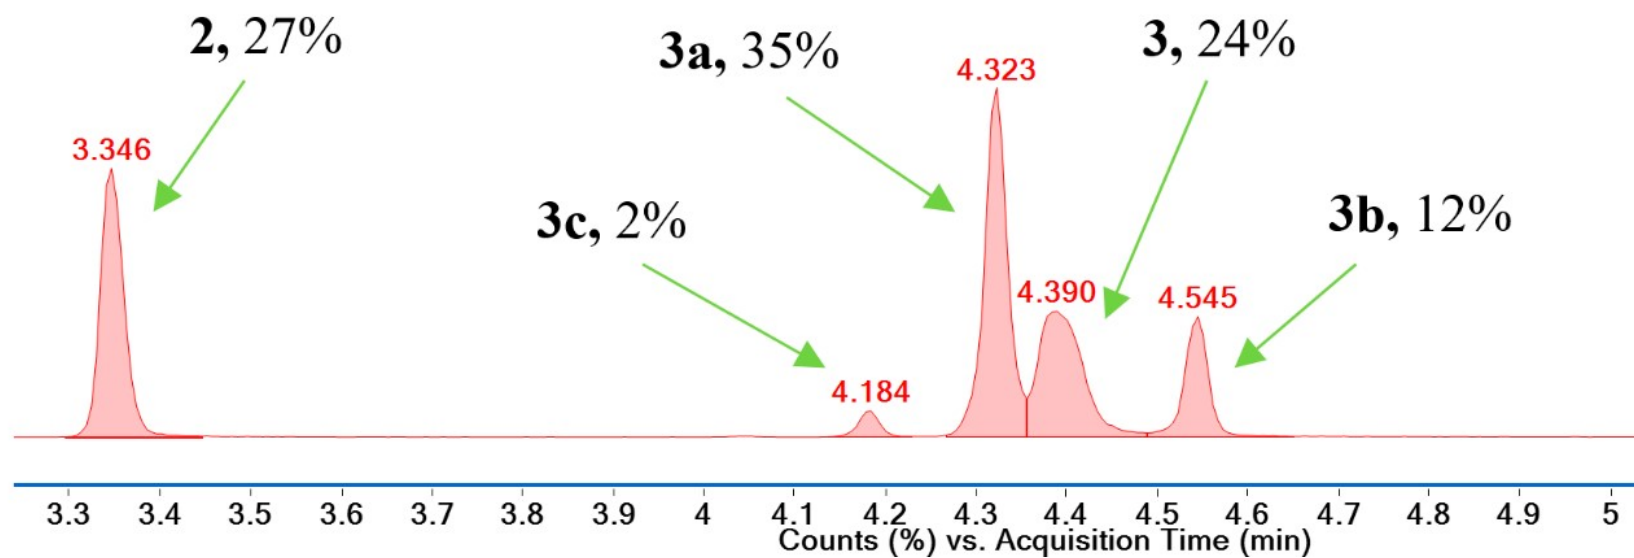

**Figure S19.** LC-MS data of the reaction mixture of bis-imidazolium salt **2** with 1-iodooctane after 30 h of stirring at 90 $^\circ\text{C}$ .







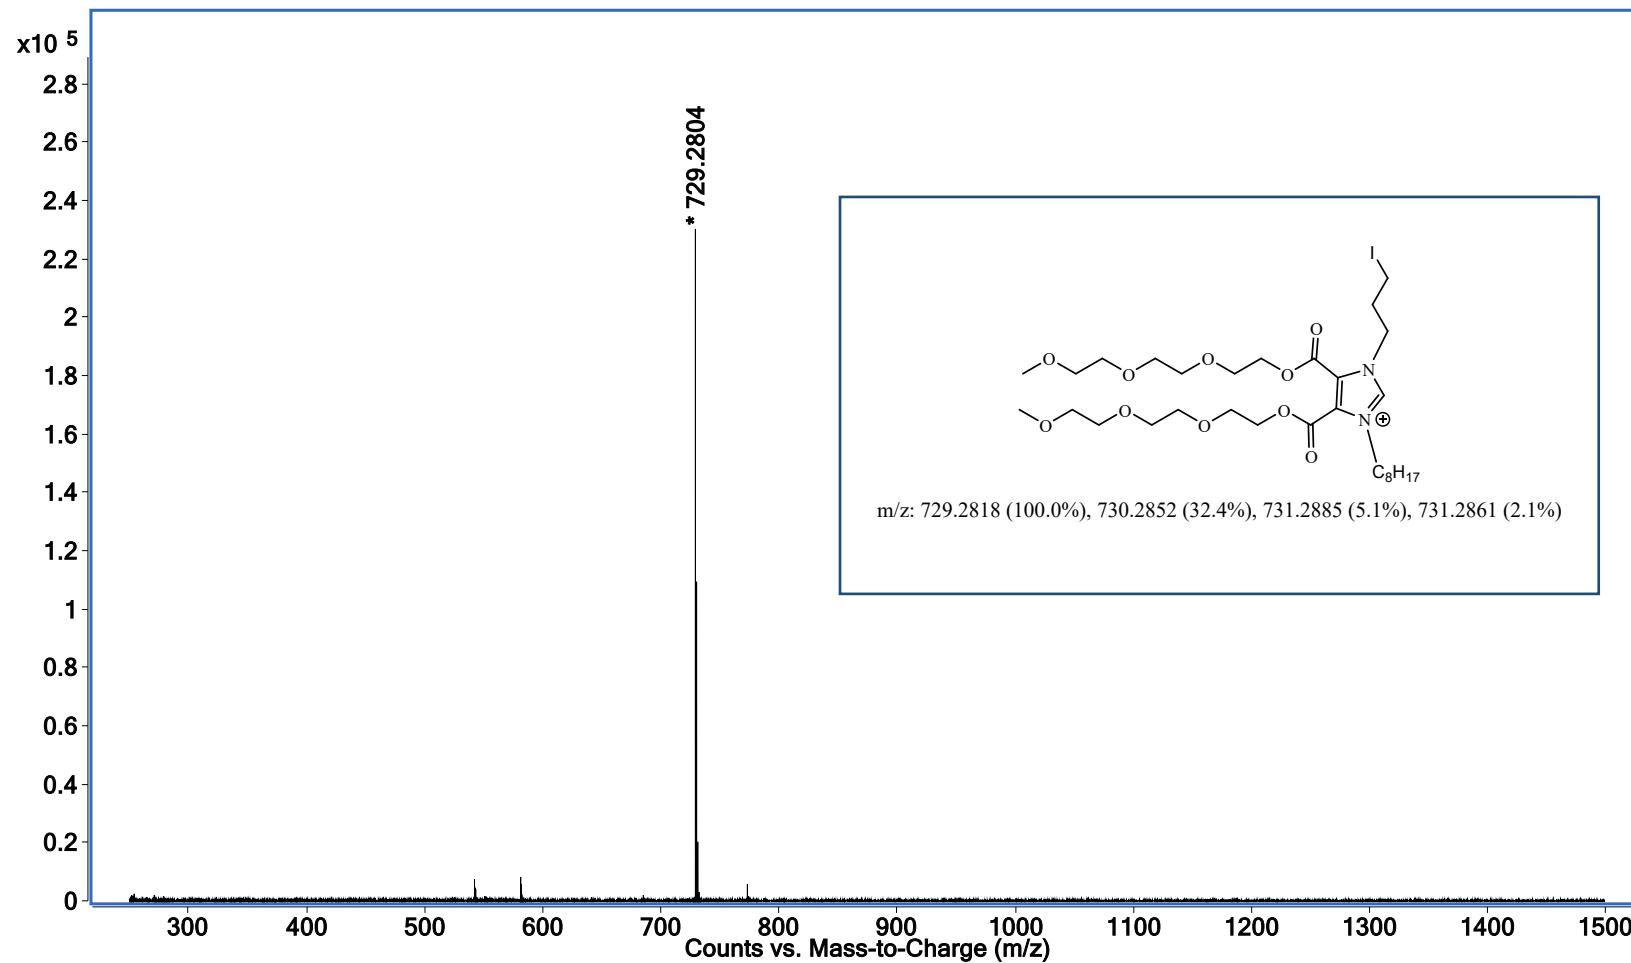

Figure S20. ESI-MS spectra of **3** and **3a-c**.

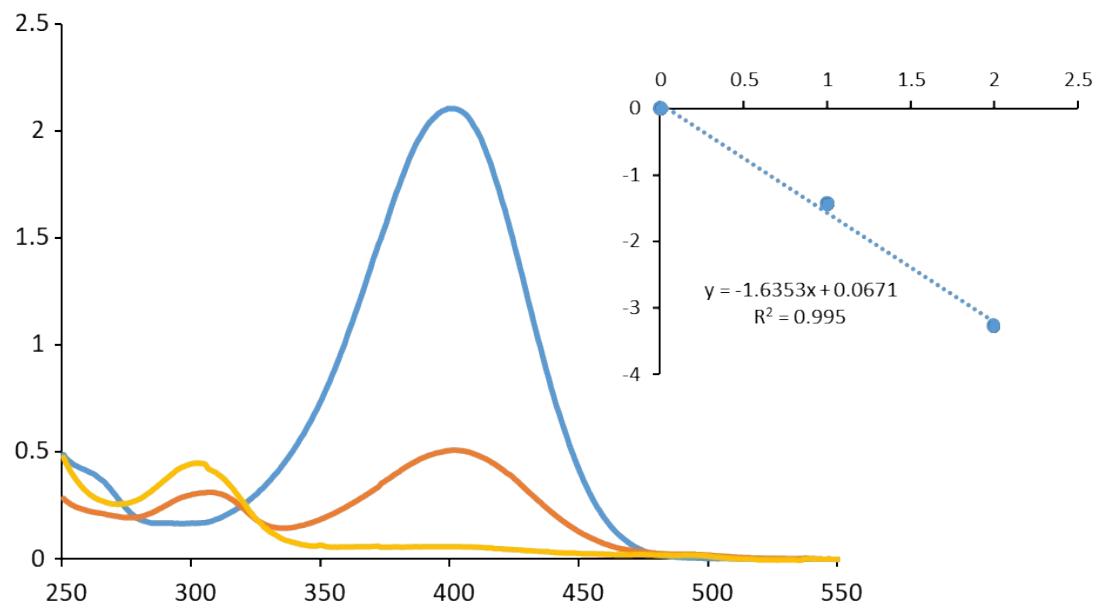

**Figure S21.** UV-visible spectra and  $\ln(C_t/C_0)$  time dependence of a mixture of *p*-nitrophenol and sodium borohydride in the presence of **6**; water-THF, where THF is 0.4 vol.%,  $C(p\text{-nitrophenol})=0.1$  mM,  $C(\text{NaBH}_4)=5$  mM,  $C(\mathbf{6})=0.002$  mM (0.2 mol%),  $l=1\text{cm}$ .

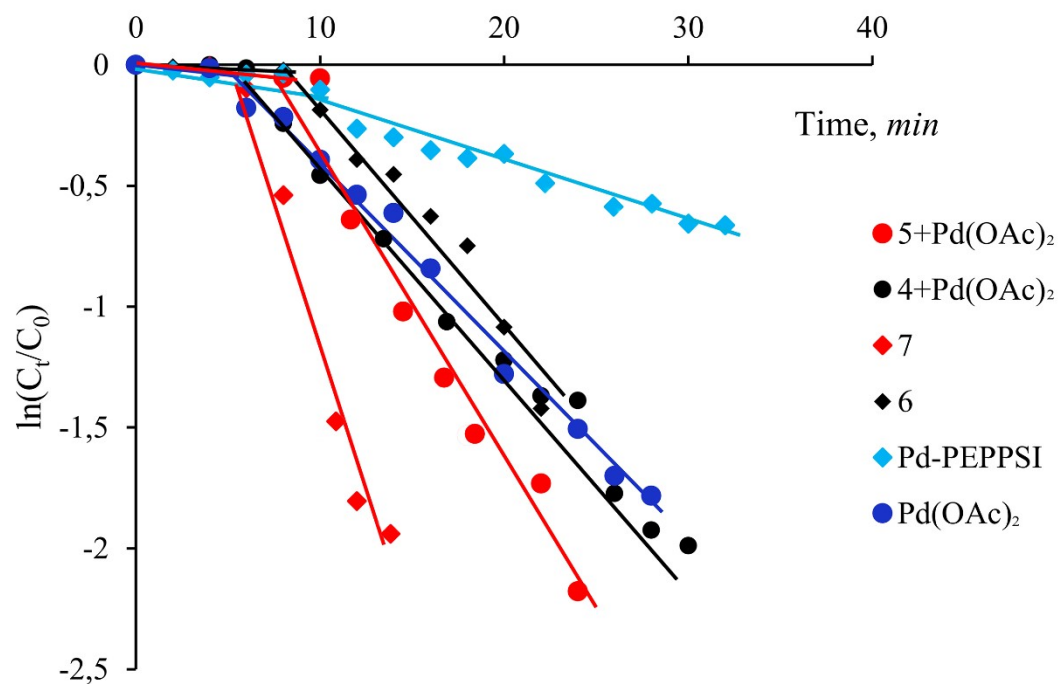

**Figure S22.** Time dependence of  $\ln(C_t/C_0)$  of a mixture of *p*-ethylnitrobenzene and sodium borohydride in the presence of **6**, **7**, **4**+Pd(OAc)<sub>2</sub>, **5**+Pd(OAc)<sub>2</sub>, Pd(OAc)<sub>2</sub> or Pd-PEPPSI; water with 0.2 vol% THF,  $C(p\text{-ethylnitrobenzene}) = 0.1 \text{ mM}$ ,  $C(\text{NaBH}_4) = 5 \text{ mM}$ ,  $C(\mathbf{4}) = C(\mathbf{5}) = C(\mathbf{6}) = C(\mathbf{7}) = C(\text{Pd(OAc)}_2) = C(\text{Pd-PEPPSI}) = 0.002 \text{ mM}$  (0.2 mol%),  $l = 1 \text{ cm}$ .



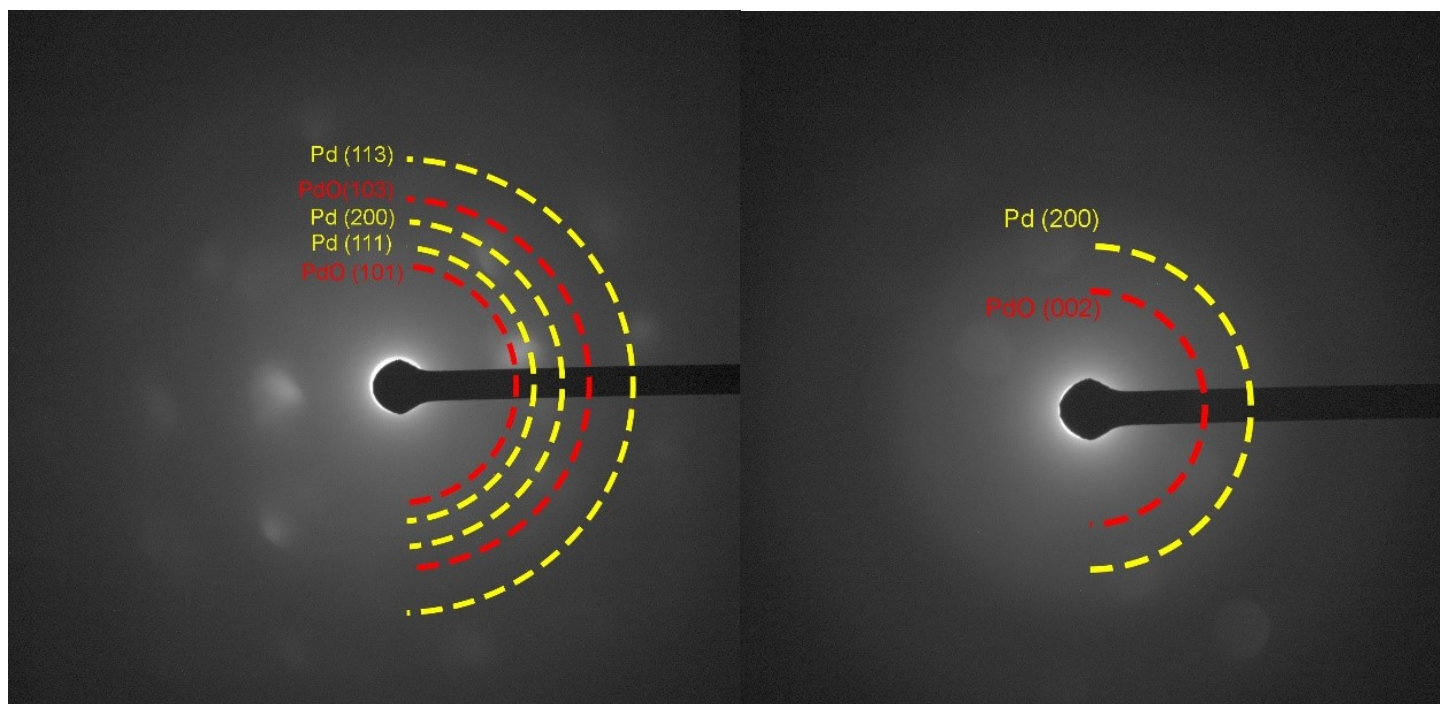

**Figure S22.** SAED images of compound A  $4+ \text{Pd}(\text{OAc})_2$  and B  $5+ \text{Pd}(\text{OAc})_2$ .

**Table S1.** Interplanar distances  $d$  (hkl) measured on the complex *in situ* and possible correlation to fcc Pd and tetragonal PdO

| 4 + Pd(OAc) <sub>2</sub> |               |               | 5 + Pd(OAc) <sub>2</sub> |               |               |
|--------------------------|---------------|---------------|--------------------------|---------------|---------------|
| d (hkl) Expt.            | Lattice plane | d (hkl) Theor | d (hkl) Expt.            | Lattice plane | d (hkl) Theor |
| 2.62                     | PdO (101)     | 2.63          | 2.67                     | PdO (002)     | 2.665         |
| 1.52                     | PdO (103)     | 1.53          |                          |               |               |
| 2.23                     | Pd (111)      | 2.24          | 1.93                     | Pd(200)       | 1.94          |
| 1.93                     | Pd (200)      | 1.94          |                          |               |               |
| 1.18                     | Pd (113)      | 1.17          |                          |               |               |
